# Supplementary material for: Effectiveness of Ultra-Low Volume insecticide spraying to prevent dengue in a non-endemic metropolitan area of Brazil
Source: PLoS Comput Biol. 2019 Mar 8;15(3):e1006831. doi: 10.1371/journal.pcbi.1006831 (PMC6426269; doi:10.1371/journal.pcbi.1006831)
Supplement: S1 Table — (XLSX) [file pcbi.1006831.s002.xlsx]

## Sheet: Porto Alegre 2015-2016
TRAP_ID	AEDES_AEGYPTI	DATE	LAT	LONG
298	2	2015-12-01	-30.0679	-51.1804
301	1	2015-12-01	-30.0662	-51.1857
309	0	2015-12-01	-30.0667	-51.1835
312	0	2015-12-01	-30.0667	-51.1814
313	0	2015-12-01	-30.0689	-51.1844
338	0	2015-12-01	-30.0701	-51.1815
340	1	2015-12-01	-30.0721	-51.1803
343	0	2015-12-01	-30.0712	-51.1782
367	1	2015-12-01	-30.0707	-51.186
416	1	2015-12-01	-30.0715	-51.1831
418	0	2015-12-01	-30.0726	-51.1847
419	1	2015-12-01	-30.0735	-51.1876
420	1	2015-12-01	-30.0733	-51.1899
426	0	2015-12-01	-30.0728	-51.1917
443	0	2015-12-01	-30.0713	-51.1933
559	2	2015-12-01	-30.0673	-51.1891
560	0	2015-12-01	-30.0688	-51.1885
561	0	2015-12-01	-30.0713	-51.1905
182	3	2015-12-01	-30.0506	-51.2118
202	0	2015-12-01	-30.0522	-51.2129
256	0	2015-12-01	-30.0564	-51.2136
260	0	2015-12-01	-30.057	-51.2155
261	0	2015-12-01	-30.0586	-51.2171
191	4	2015-12-01	-30.044	-51.1516
194	0	2015-12-01	-30.0419	-51.1523
198	0	2015-12-01	-30.0422	-51.1553
107	0	2015-12-01	-30.0972	-51.2302
110	1	2015-12-01	-30.0986	-51.2269
117	0	2015-12-01	-30.1006	-51.2272
122	0	2015-12-01	-30.1004	-51.2296
127	1	2015-12-01	-30.1025	-51.2297
13	1	2015-12-01	-30.0969	-51.225
130	0	2015-12-01	-30.1034	-51.2279
133	0	2015-12-01	-30.1022	-51.2264
159	0	2015-12-01	-30.1029	-51.2315
161	1	2015-12-01	-30.1095	-51.2229
165	0	2015-12-01	-30.1084	-51.221
173	0	2015-12-01	-30.1063	-51.223
178	0	2015-12-01	-30.1075	-51.2254
185	0	2015-12-01	-30.105	-51.2267
187	0	2015-12-01	-30.1042	-51.2235
23	0	2015-12-01	-30.0954	-51.2298
369	0	2015-12-01	-30.1209	-51.2208
39	0	2015-12-01	-30.0985	-51.2319
5	1	2015-12-01	-30.0955	-51.2275
58	0	2015-12-01	-30.0979	-51.2344
696	0	2015-12-01	-30.08	-51.1974
680	0	2015-12-01	-30.0714	-51.206
681	0	2015-12-01	-30.0777	-51.2044
687	0	2015-12-01	-30.0717	-51.2025
688	0	2015-12-01	-30.0756	-51.1941
690	0	2015-12-01	-30.0726	-51.1998
691	0	2015-12-01	-30.071	-51.1999
693	0	2015-12-01	-30.0753	-51.198
698	1	2015-12-01	-30.0771	-51.2062
699	0	2015-12-01	-30.0791	-51.1971
706	1	2015-12-01	-30.0707	-51.1971
240	0	2015-12-01	-30.0456	-51.1493
242	1	2015-12-01	-30.0435	-51.1492
302	1	2015-12-01	-30.0445	-51.1421
303	2	2015-12-01	-30.0434	-51.1448
304	0	2015-12-01	-30.0466	-51.1411
307	0	2015-12-01	-30.0449	-51.137
371	0	2015-12-01	-30.0489	-51.1456
374	0	2015-12-01	-30.0463	-51.1448
386	0	2015-12-01	-30.0505	-51.1447
392	0	2015-12-01	-30.0482	-51.1489
395	1	2015-12-01	-30.0481	-51.147
396	3	2015-12-01	-30.0446	-51.1473
397	1	2015-12-01	-30.046	-51.1471
398	1	2015-12-01	-30.0526	-51.1474
434	2	2015-12-01	-30.0558	-51.1435
435	0	2015-12-01	-30.0579	-51.1431
444	0	2015-12-01	-30.0577	-51.1445
475	0	2015-12-01	-30.0553	-51.1465
477	1	2015-12-01	-30.0556	-51.1489
478	0	2015-12-01	-30.054	-51.1494
479	0	2015-12-01	-30.0538	-51.1516
480	1	2015-12-01	-30.0512	-51.1495
685	0	2015-12-01	-30.0682	-51.2079
709	0	2015-12-01	-30.0701	-51.2057
713	0	2015-12-01	-30.0688	-51.2045
572	0	2015-12-01	-30.0475	-51.2223
576	0	2015-12-01	-30.0473	-51.2187
581	0	2015-12-01	-30.0468	-51.2213
582	0	2015-12-01	-30.0442	-51.2263
633	0	2015-12-01	-30.0446	-51.2242
607	0	2015-12-01	-30.0937	-51.2249
608	0	2015-12-01	-30.0946	-51.2222
609	0	2015-12-01	-30.1002	-51.2249
610	0	2015-12-01	-30.1037	-51.2212
148	1	2015-12-01	-30.0623	-51.1882
149	0	2015-12-01	-30.0619	-51.1905
153	0	2015-12-01	-30.0611	-51.1925
154	1	2015-12-01	-30.0599	-51.1932
156	1	2015-12-01	-30.0685	-51.1937
215	0	2015-12-01	-30.0646	-51.1857
216	0	2015-12-01	-30.064	-51.1985
218	1	2015-12-01	-30.0589	-51.1958
219	1	2015-12-01	-30.0624	-51.1857
344	0	2015-12-01	-30.0683	-51.2028
375	0	2015-12-01	-30.065	-51.1962
380	0	2015-12-01	-30.0666	-51.1987
383	2	2015-12-01	-30.0693	-51.2008
400	0	2015-12-01	-30.0663	-51.2002
663	1	2015-12-01	-30.0612	-51.1965
100	0	2015-12-01	-30.0098	-51.1717
103	1	2015-12-01	-30.0094	-51.1737
123	0	2015-12-01	-30.0122	-51.1664
128	1	2015-12-01	-30.0114	-51.1681
17	1	2015-12-01	-30.0113	-51.1784
2	0	2015-12-01	-30.0112	-51.18
230	2	2015-12-01	-30.0138	-51.1689
234	0	2015-12-01	-30.0142	-51.1666
245	1	2015-12-01	-30.0122	-51.1637
249	0	2015-12-01	-30.0164	-51.1668
290	1	2015-12-01	-30.0162	-51.1697
308	1	2015-12-01	-30.014	-51.162
37	0	2015-12-01	-30.0141	-51.1769
55	0	2015-12-01	-30.0157	-51.1753
59	0	2015-12-01	-30.0176	-51.1716
63	0	2015-12-01	-30.0171	-51.1739
66	2	2015-12-01	-30.0146	-51.1733
70	0	2015-12-01	-30.0121	-51.1722
75	0	2015-12-01	-30.0125	-51.1739
224	0	2015-12-01	-30.0666	-51.2219
25	0	2015-12-01	-30.0662	-51.2274
283	0	2015-12-01	-30.0689	-51.2229
36	0	2015-12-01	-30.0692	-51.2291
407	1	2015-12-01	-30.0707	-51.2229
41	0	2015-12-01	-30.0705	-51.2298
554	0	2015-12-01	-30.062	-51.2185
61	0	2015-12-01	-30.068	-51.2323
622	0	2015-12-01	-30.0745	-51.2319
72	1	2015-12-01	-30.07	-51.2319
95	1	2015-12-01	-30.067	-51.2242
167	0	2015-12-01	-30.0501	-51.2064
628	0	2015-12-01	-30.0489	-51.2092
741	0	2015-12-01	-30.0494	-51.2011
854	0	2015-12-01	-30.0432	-51.2138
857	2	2015-12-01	-30.0429	-51.2083
860	0	2015-12-01	-30.045	-51.2078
862	0	2015-12-01	-30.0477	-51.209
863	0	2015-12-01	-30.045	-51.2052
864	0	2015-12-01	-30.0471	-51.2066
865	2	2015-12-01	-30.0513	-51.2045
866	0	2015-12-01	-30.0483	-51.2053
867	0	2015-12-01	-30.0497	-51.2037
868	0	2015-12-01	-30.0455	-51.2018
869	1	2015-12-01	-30.0478	-51.1981
870	0	2015-12-01	-30.0464	-51.1992
871	0	2015-12-01	-30.0452	-51.2011
872	1	2015-12-01	-30.0471	-51.2009
873	0	2015-12-01	-30.0443	-51.203
679	0	2015-12-01	-30.0826	-51.2046
705	0	2015-12-01	-30.0801	-51.2077
754	0	2015-12-01	-30.0845	-51.2084
755	0	2015-12-01	-30.0842	-51.2064
756	0	2015-12-01	-30.0777	-51.2121
757	0	2015-12-01	-30.0843	-51.2112
759	0	2015-12-01	-30.0872	-51.2068
760	1	2015-12-01	-30.0861	-51.2091
762	0	2015-12-01	-30.0785	-51.2089
763	0	2015-12-01	-30.0804	-51.2109
764	0	2015-12-01	-30.0812	-51.2053
765	0	2015-12-01	-30.079	-51.2046
766	0	2015-12-01	-30.0826	-51.2071
767	0	2015-12-01	-30.0859	-51.2049
492	1	2015-12-01	-30.0411	-51.1536
588	0	2015-12-01	-30.0323	-51.1576
602	0	2015-12-01	-30.0366	-51.1583
743	0	2015-12-01	-30.0386	-51.1562
744	0	2015-12-01	-30.0355	-51.1574
793	0	2015-12-01	-30.0339	-51.1538
794	0	2015-12-01	-30.0316	-51.1556
795	0	2015-12-01	-30.0377	-51.1519
796	0	2015-12-01	-30.0397	-51.1539
797	1	2015-12-01	-30.0362	-51.1544
798	0	2015-12-01	-30.04	-51.1513
799	0	2015-12-01	-30.0296	-51.1539
811	0	2015-12-01	-30.0308	-51.1485
812	4	2015-12-01	-30.0327	-51.1497
813	0	2015-12-01	-30.029	-51.1506
814	0	2015-12-01	-30.0327	-51.1524
815	0	2015-12-01	-30.0283	-51.1476
816	0	2015-12-01	-30.0306	-51.1521
817	0	2015-12-01	-30.0375	-51.1495
818	0	2015-12-01	-30.0358	-51.1514
105	0	2015-12-02	-30.0465	-51.215
118	0	2015-12-02	-30.0459	-51.2128
129	0	2015-12-02	-30.0477	-51.2128
169	0	2015-12-02	-30.0481	-51.2175
667	0	2015-12-02	-30.044	-51.2153
71	0	2015-12-02	-30.0432	-51.2195
742	0	2015-12-02	-30.0447	-51.2192
96	0	2015-12-02	-30.0425	-51.216
99	1	2015-12-02	-30.0459	-51.2166
143	0	2015-12-02	-30.0439	-51.1616
195	0	2015-12-02	-30.0453	-51.1514
31	1	2015-12-02	-30.0458	-51.1657
34	0	2015-12-02	-30.0419	-51.1662
47	0	2015-12-02	-30.0411	-51.1684
49	0	2015-12-02	-30.0459	-51.1721
86	0	2015-12-02	-30.0414	-51.1718
87	0	2015-12-02	-30.0435	-51.1686
88	1	2015-12-02	-30.0457	-51.1688
430	0	2015-12-02	-30.124	-51.2238
750	0	2015-12-02	-30.1351	-51.2276
752	0	2015-12-02	-30.134	-51.2304
753	0	2015-12-02	-30.133	-51.2346
779	0	2015-12-02	-30.1425	-51.2243
780	1	2015-12-02	-30.1416	-51.2228
781	0	2015-12-02	-30.1403	-51.2209
782	0	2015-12-02	-30.141	-51.2244
784	0	2015-12-02	-30.1371	-51.2235
786	0	2015-12-02	-30.1393	-51.2266
788	0	2015-12-02	-30.1344	-51.2331
791	1	2015-12-02	-30.1375	-51.2279
792	0	2015-12-02	-30.1302	-51.2334
201	0	2015-12-02	-30.0497	-51.1648
207	0	2015-12-02	-30.0502	-51.1686
244	1	2015-12-02	-30.0483	-51.1714
246	0	2015-12-02	-30.0488	-51.1695
247	2	2015-12-02	-30.0483	-51.1663
248	1	2015-12-02	-30.0503	-51.1717
700	0	2015-12-02	-30.0657	-51.2136
703	0	2015-12-02	-30.063	-51.2132
710	0	2015-12-02	-30.062	-51.2081
712	0	2015-12-02	-30.0668	-51.2054
714	0	2015-12-02	-30.0586	-51.2112
716	0	2015-12-02	-30.0579	-51.2134
717	0	2015-12-02	-30.0596	-51.2101
718	0	2015-12-02	-30.0547	-51.2118
719	0	2015-12-02	-30.0626	-51.212
720	0	2015-12-02	-30.0564	-51.2099
721	0	2015-12-02	-30.07	-51.2105
722	1	2015-12-02	-30.0686	-51.2093
723	0	2015-12-02	-30.0665	-51.2107
724	0	2015-12-02	-30.0622	-51.2159
725	0	2015-12-02	-30.0605	-51.2185
726	0	2015-12-02	-30.0678	-51.2123
730	0	2015-12-02	-30.0613	-51.2146
731	0	2015-12-02	-30.0641	-51.2151
733	1	2015-12-02	-30.0647	-51.2116
735	1	2015-12-02	-30.0603	-51.2169
740	0	2015-12-02	-30.0632	-51.2096
114	0	2015-12-02	-30.0798	-51.2137
451	0	2015-12-02	-30.0815	-51.217
452	0	2015-12-02	-30.0811	-51.2157
453	0	2015-12-02	-30.0833	-51.2185
454	1	2015-12-02	-30.0865	-51.2193
462	1	2015-12-02	-30.0862	-51.2225
469	0	2015-12-02	-30.08	-51.2179
487	0	2015-12-02	-30.0867	-51.2128
496	1	2015-12-02	-30.0773	-51.2146
577	0	2015-12-02	-30.0865	-51.2176
579	0	2015-12-02	-30.0888	-51.22
580	0	2015-12-02	-30.0862	-51.2157
583	0	2015-12-02	-30.0836	-51.2152
605	0	2015-12-02	-30.0909	-51.2197
613	0	2015-12-02	-30.0906	-51.2281
638	0	2015-12-02	-30.082	-51.2127
146	0	2015-12-02	-30.0577	-51.1897
214	1	2015-12-02	-30.0596	-51.1798
217	0	2015-12-02	-30.0618	-51.1956
220	0	2015-12-02	-30.0595	-51.1854
221	0	2015-12-02	-30.0587	-51.185
388	0	2015-12-02	-30.0567	-51.1963
389	1	2015-12-02	-30.0552	-51.1961
42	0	2015-12-02	-30.0526	-51.201
44	0	2015-12-02	-30.0525	-51.1983
45	0	2015-12-02	-30.0522	-51.1953
46	0	2015-12-02	-30.0547	-51.1981
48	0	2015-12-02	-30.0497	-51.1962
50	0	2015-12-02	-30.0504	-51.1979
52	0	2015-12-02	-30.0526	-51.2029
53	0	2015-12-02	-30.0513	-51.2003
73	0	2015-12-02	-30.0576	-51.1907
74	0	2015-12-02	-30.0574	-51.193
83	0	2015-12-02	-30.055	-51.1907
84	3	2015-12-02	-30.0534	-51.1933
85	1	2015-12-02	-30.0549	-51.1925
176	1	2015-12-02	-30.0748	-51.2184
181	0	2015-12-02	-30.0756	-51.2295
193	0	2015-12-02	-30.0779	-51.2293
287	0	2015-12-02	-30.0691	-51.2144
294	0	2015-12-02	-30.0707	-51.2142
384	2	2015-12-02	-30.078	-51.2207
393	2	2015-12-02	-30.075	-51.2148
394	1	2015-12-02	-30.0768	-51.2167
450	1	2015-12-02	-30.0766	-51.2271
455	0	2015-12-02	-30.0794	-51.2289
464	0	2015-12-02	-30.0793	-51.2311
466	0	2015-12-02	-30.0806	-51.227
468	0	2015-12-02	-30.079	-51.2259
476	2	2015-12-02	-30.0803	-51.2244
506	1	2015-12-02	-30.0791	-51.2225
531	1	2015-12-02	-30.0819	-51.2295
564	1	2015-12-02	-30.0731	-51.2139
621	0	2015-12-02	-30.0771	-51.2311
623	0	2015-12-02	-30.081	-51.2317
54	0	2015-12-02	-30.0405	-51.2139
852	0	2015-12-02	-30.0382	-51.2096
853	0	2015-12-02	-30.0398	-51.2114
855	0	2015-12-02	-30.0419	-51.211
856	0	2015-12-02	-30.0408	-51.2093
858	1	2015-12-02	-30.0437	-51.2109
861	0	2015-12-02	-30.0458	-51.2107
336	0	2015-12-02	-30.0592	-51.2079
771	0	2015-12-02	-30.0179	-51.1574
773	0	2015-12-02	-30.0184	-51.1539
778	0	2015-12-02	-30.0289	-51.1565
829	0	2015-12-02	-30.0259	-51.148
830	0	2015-12-02	-30.0246	-51.1462
831	1	2015-12-02	-30.0222	-51.1464
832	0	2015-12-02	-30.0165	-51.1449
834	0	2015-12-02	-30.0144	-51.149
835	0	2015-12-02	-30.0237	-51.1485
836	0	2015-12-02	-30.02	-51.1468
837	2	2015-12-02	-30.0179	-51.1463
838	0	2015-12-02	-30.0219	-51.1488
839	1	2015-12-02	-30.0261	-51.1508
840	0	2015-12-02	-30.012	-51.1447
841	0	2015-12-02	-30.0219	-51.1515
842	0	2015-12-02	-30.0137	-51.1451
843	0	2015-12-02	-30.0246	-51.1511
844	1	2015-12-02	-30.0201	-51.1518
845	1	2015-12-02	-30.0135	-51.147
846	0	2015-12-02	-30.0179	-51.1512
847	1	2015-12-02	-30.0119	-51.1465
848	1	2015-12-02	-30.0131	-51.1487
849	0	2015-12-02	-30.018	-51.149
850	0	2015-12-02	-30.0195	-51.1493
851	0	2015-12-02	-30.0155	-51.147
558	0	2015-12-03	-30.0705	-51.1914
192	1	2015-12-03	-30.0431	-51.1535
90	5	2015-12-03	-30.0413	-51.163
330	0	2015-12-03	-30.13	-51.2236
370	0	2015-12-03	-30.1252	-51.2202
406	0	2015-12-03	-30.1354	-51.2236
569	0	2015-12-03	-30.1274	-51.2207
571	0	2015-12-03	-30.1302	-51.2203
575	0	2015-12-03	-30.1283	-51.2226
32	0	2015-12-03	-30.0447	-51.222
664	1	2015-12-03	-30.0394	-51.2231
665	1	2015-12-03	-30.0399	-51.2204
666	0	2015-12-03	-30.0399	-51.2262
668	0	2015-12-03	-30.0379	-51.2235
669	0	2015-12-03	-30.0361	-51.2237
670	0	2015-12-03	-30.0357	-51.2218
671	0	2015-12-03	-30.0369	-51.221
672	0	2015-12-03	-30.0429	-51.2254
673	0	2015-12-03	-30.0383	-51.2256
674	0	2015-12-03	-30.0419	-51.2231
675	0	2015-12-03	-30.0419	-51.2207
676	0	2015-12-03	-30.0416	-51.2182
12	0	2015-12-03	-30.0332	-51.2173
4	0	2015-12-03	-30.0328	-51.2197
682	0	2015-12-03	-30.073	-51.2046
686	0	2015-12-03	-30.0773	-51.1975
695	1	2015-12-03	-30.0755	-51.2082
800	0	2015-12-03	-30.1388	-51.2242
803	0	2015-12-03	-30.1269	-51.224
804	0	2015-12-03	-30.1285	-51.2261
824	0	2015-12-03	-30.1213	-51.2254
825	0	2015-12-03	-30.1215	-51.2286
826	0	2015-12-03	-30.1254	-51.2292
827	0	2015-12-03	-30.1228	-51.2275
828	0	2015-12-03	-30.1236	-51.2256
701	0	2015-12-03	-30.0654	-51.2045
702	1	2015-12-03	-30.0659	-51.2088
708	1	2015-12-03	-30.0716	-51.2088
711	0	2015-12-03	-30.064	-51.206
715	0	2015-12-03	-30.0648	-51.2025
732	0	2015-12-03	-30.0654	-51.2077
168	0	2015-12-03	-30.0529	-51.2198
171	0	2015-12-03	-30.0505	-51.2202
568	0	2015-12-03	-30.0489	-51.221
570	1	2015-12-03	-30.0493	-51.2239
574	2	2015-12-03	-30.0469	-51.2239
578	0	2015-12-03	-30.0463	-51.2274
627	0	2015-12-03	-30.0501	-51.2224
630	3	2015-12-03	-30.0539	-51.2264
631	1	2015-12-03	-30.0518	-51.2241
632	0	2015-12-03	-30.0503	-51.2272
640	1	2015-12-03	-30.0557	-51.2216
641	0	2015-12-03	-30.0562	-51.2243
642	1	2015-12-03	-30.0541	-51.2247
643	1	2015-12-03	-30.0537	-51.2218
650	0	2015-12-03	-30.0559	-51.2265
654	0	2015-12-03	-30.0605	-51.2222
449	0	2015-12-03	-30.0899	-51.2172
465	0	2015-12-03	-30.0829	-51.2222
474	0	2015-12-03	-30.0789	-51.2159
481	0	2015-12-03	-30.0894	-51.2144
482	0	2015-12-03	-30.0873	-51.2156
483	0	2015-12-03	-30.0888	-51.2128
484	0	2015-12-03	-30.0894	-51.2102
485	0	2015-12-03	-30.0861	-51.2111
486	0	2015-12-03	-30.085	-51.2129
488	0	2015-12-03	-30.091	-51.2135
512	0	2015-12-03	-30.0839	-51.224
520	0	2015-12-03	-30.091	-51.2295
604	0	2015-12-03	-30.0894	-51.2226
606	0	2015-12-03	-30.0916	-51.222
611	0	2015-12-03	-30.0933	-51.2313
612	0	2015-12-03	-30.0924	-51.228
614	0	2015-12-03	-30.0916	-51.2244
615	0	2015-12-03	-30.089	-51.2249
147	0	2015-12-03	-30.0596	-51.1908
213	0	2015-12-03	-30.059	-51.1767
222	0	2015-12-03	-30.064	-51.1798
223	2	2015-12-03	-30.0607	-51.177
267	0	2015-12-03	-30.0596	-51.1563
268	0	2015-12-03	-30.0601	-51.1595
269	1	2015-12-03	-30.0575	-51.1566
270	0	2015-12-03	-30.0568	-51.1688
271	1	2015-12-03	-30.06	-51.166
274	0	2015-12-03	-30.0573	-51.166
276	0	2015-12-03	-30.057	-51.1591
278	0	2015-12-03	-30.0576	-51.1611
282	0	2015-12-03	-30.0621	-51.1609
314	0	2015-12-03	-30.0638	-51.152
315	0	2015-12-03	-30.0642	-51.1535
316	0	2015-12-03	-30.0639	-51.1562
317	0	2015-12-03	-30.0618	-51.1542
318	0	2015-12-03	-30.0595	-51.1532
321	0	2015-12-03	-30.0596	-51.1563
322	0	2015-12-03	-30.0617	-51.1516
324	0	2015-12-03	-30.0609	-51.1562
401	0	2015-12-03	-30.0599	-51.1694
402	0	2015-12-03	-30.0596	-51.1611
113	0	2015-12-03	-30.0674	-51.2263
121	0	2015-12-03	-30.0711	-51.2254
131	0	2015-12-03	-30.0739	-51.2251
189	0	2015-12-03	-30.0748	-51.2275
232	3	2015-12-03	-30.0659	-51.2187
258	0	2015-12-03	-30.07	-51.2168
28	0	2015-12-03	-30.0672	-51.23
311	1	2015-12-03	-30.0723	-51.2183
378	0	2015-12-03	-30.0801	-51.2201
382	1	2015-12-03	-30.0784	-51.2186
390	1	2015-12-03	-30.075	-51.2204
391	0	2015-12-03	-30.0776	-51.2228
403	0	2015-12-03	-30.0716	-51.2212
405	0	2015-12-03	-30.0726	-51.2233
411	0	2015-12-03	-30.0732	-51.2204
414	0	2015-12-03	-30.0745	-51.2224
421	0	2015-12-03	-30.0754	-51.2242
497	0	2015-12-03	-30.0823	-51.2225
501	0	2015-12-03	-30.0824	-51.2254
519	1	2015-12-03	-30.0838	-51.2276
555	0	2015-12-03	-30.0648	-51.2174
557	0	2015-12-03	-30.0669	-51.215
563	1	2015-12-03	-30.0733	-51.2162
566	0	2015-12-03	-30.0726	-51.2282
98	0	2015-12-03	-30.0693	-51.2254
262	0	2015-12-03	-30.0537	-51.207
263	1	2015-12-03	-30.0527	-51.2108
266	1	2015-12-03	-30.0525	-51.2057
319	0	2015-12-03	-30.0565	-51.2014
323	0	2015-12-03	-30.0585	-51.2022
326	0	2015-12-03	-30.0621	-51.2059
331	1	2015-12-03	-30.0577	-51.2048
332	0	2015-12-03	-30.0541	-51.2043
333	1	2015-12-03	-30.053	-51.2078
334	0	2015-12-03	-30.0539	-51.2026
337	0	2015-12-03	-30.0552	-51.2075
347	2	2015-12-03	-30.0644	-51.2004
352	0	2015-12-03	-30.0617	-51.2007
360	1	2015-12-03	-30.0597	-51.1975
362	0	2015-12-03	-30.059	-51.1999
363	1	2015-12-03	-30.0606	-51.2028
768	0	2015-12-03	-30.0226	-51.1586
769	0	2015-12-03	-30.0211	-51.1595
770	0	2015-12-03	-30.0185	-51.1591
772	0	2015-12-03	-30.0208	-51.1571
774	0	2015-12-03	-30.0227	-51.1539
775	0	2015-12-03	-30.02	-51.154
776	0	2015-12-03	-30.024	-51.1536
777	0	2015-12-03	-30.0265	-51.153
237	0	2015-12-04	-30.0747	-51.1753
345	0	2015-12-04	-30.073	-51.1778
349	0	2015-12-04	-30.0735	-51.1755
351	0	2015-12-04	-30.0766	-51.1736
354	0	2015-12-04	-30.0782	-51.1727
357	1	2015-12-04	-30.0727	-51.1815
361	3	2015-12-04	-30.0752	-51.1815
364	3	2015-12-04	-30.075	-51.1841
417	1	2015-12-04	-30.0766	-51.1712
177	0	2015-12-04	-30.0515	-51.209
188	1	2015-12-04	-30.0497	-51.2138
199	1	2015-12-04	-30.0528	-51.2144
200	1	2015-12-04	-30.0528	-51.2171
254	0	2015-12-04	-30.0547	-51.2153
264	0	2015-12-04	-30.0538	-51.2165
265	0	2015-12-04	-30.0575	-51.2174
736	0	2015-12-04	-30.0508	-51.2157
739	0	2015-12-04	-30.0517	-51.2142
21	1	2015-12-04	-30.0357	-51.2186
56	0	2015-12-04	-30.0364	-51.2107
60	0	2015-12-04	-30.039	-51.2138
67	0	2015-12-04	-30.0402	-51.2158
745	0	2015-12-04	-30.1314	-51.2303
746	0	2015-12-04	-30.1303	-51.2311
747	0	2015-12-04	-30.1303	-51.2281
748	0	2015-12-04	-30.1318	-51.2255
749	0	2015-12-04	-30.1336	-51.2248
751	0	2015-12-04	-30.1326	-51.2269
783	0	2015-12-04	-30.1389	-51.2219
785	0	2015-12-04	-30.1366	-51.2249
787	1	2015-12-04	-30.1329	-51.2322
789	2	2015-12-04	-30.1331	-51.2286
790	1	2015-12-04	-30.1361	-51.2302
728	0	2015-12-04	-30.0709	-51.2125
729	0	2015-12-04	-30.0722	-51.2122
734	0	2015-12-04	-30.0594	-51.2126
629	0	2015-12-04	-30.049	-51.2184
639	0	2015-12-04	-30.0554	-51.2183
644	0	2015-12-04	-30.0541	-51.2189
646	0	2015-12-04	-30.058	-51.2264
647	0	2015-12-04	-30.0587	-51.2217
648	0	2015-12-04	-30.0583	-51.2205
649	0	2015-12-04	-30.0584	-51.224
651	0	2015-12-04	-30.0585	-51.2285
652	0	2015-12-04	-30.0555	-51.2287
653	0	2015-12-04	-30.061	-51.2249
655	0	2015-12-04	-30.0602	-51.2241
656	0	2015-12-04	-30.0606	-51.2278
657	0	2015-12-04	-30.0609	-51.2294
659	0	2015-12-04	-30.0632	-51.23
660	0	2015-12-04	-30.0622	-51.2269
661	0	2015-12-04	-30.0628	-51.2234
737	0	2015-12-04	-30.0648	-51.2243
738	0	2015-12-04	-30.0643	-51.227
467	0	2015-12-04	-30.0856	-51.2263
157	0	2015-12-04	-30.0689	-51.1907
1	0	2015-12-04	-30.0667	-51.2343
15	0	2015-12-04	-30.0696	-51.2378
19	0	2015-12-04	-30.0657	-51.2316
522	0	2015-12-04	-30.0848	-51.2303
57	0	2015-12-04	-30.0648	-51.2294
8	0	2015-12-04	-30.0684	-51.2364
859	0	2015-12-04	-30.0443	-51.2129
329	0	2015-12-04	-30.06	-51.2054
341	0	2015-12-04	-30.0617	-51.1979
355	1	2015-12-04	-30.0622	-51.2031
365	0	2015-12-04	-30.0568	-51.1974
727	0	2015-12-04	-30.0752	-51.2112
761	0	2015-12-04	-30.082	-51.2092
301	0	2015-12-07	-30.0662	-51.1857
309	0	2015-12-07	-30.0667	-51.1835
313	0	2015-12-07	-30.0689	-51.1844
367	0	2015-12-07	-30.0707	-51.186
419	1	2015-12-07	-30.0735	-51.1876
420	1	2015-12-07	-30.0733	-51.1899
422	0	2015-12-07	-30.0757	-51.1908
423	2	2015-12-07	-30.0751	-51.1867
424	1	2015-12-07	-30.0748	-51.1914
426	0	2015-12-07	-30.0728	-51.1917
559	1	2015-12-07	-30.0673	-51.1891
560	0	2015-12-07	-30.0688	-51.1885
561	0	2015-12-07	-30.0713	-51.1905
134	0	2015-12-07	-30.0416	-51.1605
135	0	2015-12-07	-30.05	-51.162
138	2	2015-12-07	-30.0459	-51.1587
141	0	2015-12-07	-30.0456	-51.1565
192	1	2015-12-07	-30.0431	-51.1535
198	0	2015-12-07	-30.0422	-51.1553
35	0	2015-12-07	-30.0437	-51.1659
528	0	2015-12-07	-30.0478	-51.161
553	1	2015-12-07	-30.0451	-51.1544
603	0	2015-12-07	-30.0457	-51.1619
89	0	2015-12-07	-30.0413	-51.1585
91	0	2015-12-07	-30.0479	-51.1637
92	3	2015-12-07	-30.046	-51.1635
93	1	2015-12-07	-30.0446	-51.1637
110	0	2015-12-07	-30.0986	-51.2269
117	0	2015-12-07	-30.1006	-51.2272
122	0	2015-12-07	-30.1004	-51.2296
126	1	2015-12-07	-30.1011	-51.2314
159	0	2015-12-07	-30.1029	-51.2315
196	1	2015-12-07	-30.1076	-51.2274
228	0	2015-12-07	-30.1148	-51.2264
23	0	2015-12-07	-30.0954	-51.2298
235	0	2015-12-07	-30.1161	-51.2278
243	0	2015-12-07	-30.1141	-51.2294
255	1	2015-12-07	-30.111	-51.2323
259	1	2015-12-07	-30.1097	-51.228
289	0	2015-12-07	-30.1056	-51.2326
291	0	2015-12-07	-30.1054	-51.2295
320	0	2015-12-07	-30.1069	-51.2313
325	0	2015-12-07	-30.109	-51.2315
379	0	2015-12-07	-30.1335	-51.2185
39	0	2015-12-07	-30.0985	-51.2319
58	0	2015-12-07	-30.0979	-51.2344
552	0	2015-12-07	-30.0317	-51.1637
585	2	2015-12-07	-30.0344	-51.164
586	0	2015-12-07	-30.03	-51.1589
587	0	2015-12-07	-30.0302	-51.1626
589	0	2015-12-07	-30.0324	-51.1612
590	0	2015-12-07	-30.029	-51.1641
591	0	2015-12-07	-30.0404	-51.1674
592	0	2015-12-07	-30.0386	-51.1622
593	0	2015-12-07	-30.0347	-51.1608
594	0	2015-12-07	-30.0365	-51.1615
595	0	2015-12-07	-30.036	-51.1638
597	0	2015-12-07	-30.0366	-51.1657
598	0	2015-12-07	-30.0324	-51.1658
599	0	2015-12-07	-30.0389	-51.168
600	0	2015-12-07	-30.0338	-51.1595
601	0	2015-12-07	-30.0383	-51.1585
425	0	2015-12-07	-30.0783	-51.1996
696	0	2015-12-07	-30.08	-51.1974
677	1	2015-12-07	-30.0739	-51.2015
678	0	2015-12-07	-30.0776	-51.2026
681	1	2015-12-07	-30.0777	-51.2044
683	0	2015-12-07	-30.0753	-51.2027
684	1	2015-12-07	-30.0798	-51.2006
688	0	2015-12-07	-30.0756	-51.1941
689	0	2015-12-07	-30.0726	-51.1951
692	0	2015-12-07	-30.0729	-51.1926
693	0	2015-12-07	-30.0753	-51.198
694	3	2015-12-07	-30.0754	-51.2003
697	0	2015-12-07	-30.0752	-51.2045
698	1	2015-12-07	-30.0771	-51.2062
699	0	2015-12-07	-30.0791	-51.1971
704	1	2015-12-07	-30.0735	-51.199
745	0	2015-12-07	-30.1314	-51.2303
746	0	2015-12-07	-30.1303	-51.2311
748	0	2015-12-07	-30.1318	-51.2255
750	0	2015-12-07	-30.1351	-51.2276
751	0	2015-12-07	-30.1326	-51.2269
752	1	2015-12-07	-30.134	-51.2304
753	0	2015-12-07	-30.133	-51.2346
783	0	2015-12-07	-30.1389	-51.2219
240	1	2015-12-07	-30.0456	-51.1493
242	0	2015-12-07	-30.0435	-51.1492
371	0	2015-12-07	-30.0489	-51.1456
374	0	2015-12-07	-30.0463	-51.1448
386	3	2015-12-07	-30.0505	-51.1447
392	0	2015-12-07	-30.0482	-51.1489
395	1	2015-12-07	-30.0481	-51.147
396	0	2015-12-07	-30.0446	-51.1473
397	1	2015-12-07	-30.046	-51.1471
398	0	2015-12-07	-30.0526	-51.1474
477	0	2015-12-07	-30.0556	-51.1489
478	0	2015-12-07	-30.054	-51.1494
479	0	2015-12-07	-30.0538	-51.1516
480	0	2015-12-07	-30.0512	-51.1495
572	0	2015-12-07	-30.0475	-51.2223
576	0	2015-12-07	-30.0473	-51.2187
581	0	2015-12-07	-30.0468	-51.2213
582	2	2015-12-07	-30.0442	-51.2263
633	1	2015-12-07	-30.0446	-51.2242
465	1	2015-12-07	-30.0829	-51.2222
148	0	2015-12-07	-30.0623	-51.1882
149	0	2015-12-07	-30.0619	-51.1905
150	0	2015-12-07	-30.0639	-51.1886
152	0	2015-12-07	-30.067	-51.1909
154	0	2015-12-07	-30.0599	-51.1932
215	0	2015-12-07	-30.0646	-51.1857
216	0	2015-12-07	-30.064	-51.1985
217	0	2015-12-07	-30.0618	-51.1956
218	0	2015-12-07	-30.0589	-51.1958
219	0	2015-12-07	-30.0624	-51.1857
372	0	2015-12-07	-30.0657	-51.1946
375	0	2015-12-07	-30.065	-51.1962
663	0	2015-12-07	-30.0612	-51.1965
106	0	2015-12-07	-30.0096	-51.1761
112	0	2015-12-07	-30.0098	-51.169
14	0	2015-12-07	-30.0094	-51.1786
158	0	2015-12-07	-30.0188	-51.1721
162	0	2015-12-07	-30.0206	-51.1711
208	0	2015-12-07	-30.0206	-51.168
209	0	2015-12-07	-30.0187	-51.1665
210	0	2015-12-07	-30.0199	-51.1617
211	0	2015-12-07	-30.0183	-51.1639
212	1	2015-12-07	-30.0165	-51.1634
230	1	2015-12-07	-30.0138	-51.1689
239	2	2015-12-07	-30.0146	-51.1637
245	1	2015-12-07	-30.0122	-51.1637
249	1	2015-12-07	-30.0164	-51.1668
252	1	2015-12-07	-30.0207	-51.1665
253	0	2015-12-07	-30.0206	-51.1643
26	0	2015-12-07	-30.0125	-51.1757
296	0	2015-12-07	-30.0254	-51.1638
308	0	2015-12-07	-30.014	-51.162
258	0	2015-12-07	-30.07	-51.2168
378	0	2015-12-07	-30.0801	-51.2201
382	3	2015-12-07	-30.0784	-51.2186
384	2	2015-12-07	-30.078	-51.2207
466	1	2015-12-07	-30.0806	-51.227
476	1	2015-12-07	-30.0803	-51.2244
506	2	2015-12-07	-30.0791	-51.2225
519	1	2015-12-07	-30.0838	-51.2276
531	2	2015-12-07	-30.0819	-51.2295
489	0	2015-12-07	-30.0344	-51.1765
490	0	2015-12-07	-30.0363	-51.1735
491	0	2015-12-07	-30.0317	-51.1761
537	0	2015-12-07	-30.0308	-51.1739
538	0	2015-12-07	-30.0298	-51.1688
539	0	2015-12-07	-30.03	-51.1662
540	2	2015-12-07	-30.0323	-51.1687
541	0	2015-12-07	-30.0289	-51.1782
542	0	2015-12-07	-30.03	-51.1732
543	1	2015-12-07	-30.0277	-51.1726
544	0	2015-12-07	-30.0283	-51.1711
545	0	2015-12-07	-30.0294	-51.1703
546	0	2015-12-07	-30.0387	-51.173
547	0	2015-12-07	-30.0375	-51.1734
548	0	2015-12-07	-30.0361	-51.1689
549	0	2015-12-07	-30.037	-51.171
550	0	2015-12-07	-30.0343	-51.1696
551	0	2015-12-07	-30.0358	-51.1756
584	1	2015-12-07	-30.0307	-51.1802
596	0	2015-12-07	-30.0394	-51.1705
298	3	2015-12-08	-30.0679	-51.1804
312	0	2015-12-08	-30.0667	-51.1814
338	0	2015-12-08	-30.0701	-51.1815
340	0	2015-12-08	-30.0721	-51.1803
343	0	2015-12-08	-30.0712	-51.1782
416	0	2015-12-08	-30.0715	-51.1831
418	0	2015-12-08	-30.0726	-51.1847
443	0	2015-12-08	-30.0713	-51.1933
105	0	2015-12-08	-30.0465	-51.215
118	0	2015-12-08	-30.0459	-51.2128
188	0	2015-12-08	-30.0497	-51.2138
202	0	2015-12-08	-30.0522	-51.2129
256	0	2015-12-08	-30.0564	-51.2136
667	0	2015-12-08	-30.044	-51.2153
71	1	2015-12-08	-30.0432	-51.2195
742	0	2015-12-08	-30.0447	-51.2192
96	0	2015-12-08	-30.0425	-51.216
99	0	2015-12-08	-30.0459	-51.2166
136	1	2015-12-08	-30.048	-51.1574
191	1	2015-12-08	-30.044	-51.1516
194	1	2015-12-08	-30.0419	-51.1523
195	0	2015-12-08	-30.0453	-51.1514
529	0	2015-12-08	-30.0475	-51.1512
530	0	2015-12-08	-30.0507	-51.1527
532	1	2015-12-08	-30.0507	-51.1587
534	0	2015-12-08	-30.0473	-51.154
535	0	2015-12-08	-30.0504	-51.1568
94	1	2015-12-08	-30.0482	-51.1557
107	0	2015-12-08	-30.0972	-51.2302
127	1	2015-12-08	-30.1025	-51.2297
13	0	2015-12-08	-30.0969	-51.225
130	0	2015-12-08	-30.1034	-51.2279
133	0	2015-12-08	-30.1022	-51.2264
165	0	2015-12-08	-30.1084	-51.221
173	0	2015-12-08	-30.1063	-51.223
185	0	2015-12-08	-30.105	-51.2267
187	0	2015-12-08	-30.1042	-51.2235
404	0	2015-12-08	-30.1375	-51.2205
5	0	2015-12-08	-30.0955	-51.2275
12	0	2015-12-08	-30.0332	-51.2173
56	0	2015-12-08	-30.0364	-51.2107
60	0	2015-12-08	-30.039	-51.2138
67	0	2015-12-08	-30.0402	-51.2158
680	0	2015-12-08	-30.0714	-51.206
682	0	2015-12-08	-30.073	-51.2046
687	0	2015-12-08	-30.0717	-51.2025
690	0	2015-12-08	-30.0726	-51.1998
691	0	2015-12-08	-30.071	-51.1999
706	0	2015-12-08	-30.0707	-51.1971
788	0	2015-12-08	-30.1344	-51.2331
302	0	2015-12-08	-30.0445	-51.1421
303	0	2015-12-08	-30.0434	-51.1448
304	0	2015-12-08	-30.0466	-51.1411
307	1	2015-12-08	-30.0449	-51.137
399	0	2015-12-08	-30.0578	-51.1465
427	4	2015-12-08	-30.0577	-51.1513
428	0	2015-12-08	-30.0564	-51.1513
429	0	2015-12-08	-30.0594	-51.1518
431	0	2015-12-08	-30.0586	-51.1498
432	0	2015-12-08	-30.0595	-51.1501
433	0	2015-12-08	-30.0569	-51.1555
435	0	2015-12-08	-30.0579	-51.1431
444	0	2015-12-08	-30.0577	-51.1445
446	1	2015-12-08	-30.062	-51.1451
470	0	2015-12-08	-30.0617	-51.1486
471	0	2015-12-08	-30.0643	-51.1491
472	0	2015-12-08	-30.0639	-51.1475
473	0	2015-12-08	-30.0628	-51.1471
475	1	2015-12-08	-30.0553	-51.1465
662	2	2015-12-08	-30.0555	-51.1591
685	0	2015-12-08	-30.0682	-51.2079
708	0	2015-12-08	-30.0716	-51.2088
709	0	2015-12-08	-30.0701	-51.2057
713	0	2015-12-08	-30.0688	-51.2045
728	0	2015-12-08	-30.0709	-51.2125
729	2	2015-12-08	-30.0722	-51.2122
608	0	2015-12-08	-30.0946	-51.2222
609	1	2015-12-08	-30.1002	-51.2249
610	0	2015-12-08	-30.1037	-51.2212
151	0	2015-12-08	-30.0643	-51.1908
156	0	2015-12-08	-30.0685	-51.1937
157	0	2015-12-08	-30.0689	-51.1907
214	1	2015-12-08	-30.0596	-51.1798
220	0	2015-12-08	-30.0595	-51.1854
221	0	2015-12-08	-30.0587	-51.185
222	1	2015-12-08	-30.064	-51.1798
223	0	2015-12-08	-30.0607	-51.177
339	0	2015-12-08	-30.0674	-51.1956
344	0	2015-12-08	-30.0683	-51.2028
348	1	2015-12-08	-30.0692	-51.1982
380	0	2015-12-08	-30.0666	-51.1987
383	0	2015-12-08	-30.0693	-51.2008
385	0	2015-12-08	-30.071	-51.1983
387	2	2015-12-08	-30.0641	-51.1924
400	0	2015-12-08	-30.0663	-51.2002
73	0	2015-12-08	-30.0576	-51.1907
74	0	2015-12-08	-30.0574	-51.193
83	1	2015-12-08	-30.055	-51.1907
85	0	2015-12-08	-30.0549	-51.1925
100	0	2015-12-08	-30.0098	-51.1717
103	0	2015-12-08	-30.0094	-51.1737
123	0	2015-12-08	-30.0122	-51.1664
128	0	2015-12-08	-30.0114	-51.1681
17	1	2015-12-08	-30.0113	-51.1784
2	1	2015-12-08	-30.0112	-51.18
234	1	2015-12-08	-30.0142	-51.1666
290	0	2015-12-08	-30.0162	-51.1697
37	0	2015-12-08	-30.0141	-51.1769
55	0	2015-12-08	-30.0157	-51.1753
59	0	2015-12-08	-30.0176	-51.1716
63	2	2015-12-08	-30.0171	-51.1739
66	2	2015-12-08	-30.0146	-51.1733
7	0	2015-12-08	-30.0092	-51.1807
70	0	2015-12-08	-30.0121	-51.1722
75	0	2015-12-08	-30.0125	-51.1739
121	0	2015-12-08	-30.0711	-51.2254
131	0	2015-12-08	-30.0739	-51.2251
160	0	2015-12-08	-30.0711	-51.2275
172	0	2015-12-08	-30.0723	-51.2309
224	0	2015-12-08	-30.0666	-51.2219
25	0	2015-12-08	-30.0662	-51.2274
28	0	2015-12-08	-30.0672	-51.23
283	1	2015-12-08	-30.0689	-51.2229
36	1	2015-12-08	-30.0692	-51.2291
403	0	2015-12-08	-30.0716	-51.2212
405	0	2015-12-08	-30.0726	-51.2233
41	2	2015-12-08	-30.0705	-51.2298
414	0	2015-12-08	-30.0745	-51.2224
421	1	2015-12-08	-30.0754	-51.2242
468	0	2015-12-08	-30.079	-51.2259
497	0	2015-12-08	-30.0811	-51.2226
522	0	2015-12-08	-30.0848	-51.2303
566	1	2015-12-08	-30.0726	-51.2282
57	1	2015-12-08	-30.0648	-51.2294
622	0	2015-12-08	-30.0745	-51.2319
72	2	2015-12-08	-30.07	-51.2319
95	0	2015-12-08	-30.067	-51.2242
98	0	2015-12-08	-30.0693	-51.2254
54	0	2015-12-08	-30.0405	-51.2139
852	0	2015-12-08	-30.0382	-51.2096
853	0	2015-12-08	-30.0398	-51.2114
854	0	2015-12-08	-30.0432	-51.2138
855	1	2015-12-08	-30.0419	-51.211
856	0	2015-12-08	-30.0408	-51.2093
857	0	2015-12-08	-30.0429	-51.2083
858	0	2015-12-08	-30.0437	-51.2109
861	0	2015-12-08	-30.0458	-51.2107
679	1	2015-12-08	-30.0826	-51.2046
705	0	2015-12-08	-30.0801	-51.2077
754	0	2015-12-08	-30.0845	-51.2084
755	1	2015-12-08	-30.0842	-51.2064
756	0	2015-12-08	-30.0777	-51.2121
757	0	2015-12-08	-30.0843	-51.2112
759	0	2015-12-08	-30.0872	-51.2068
760	0	2015-12-08	-30.0861	-51.2091
761	0	2015-12-08	-30.082	-51.2092
762	0	2015-12-08	-30.0785	-51.2089
763	0	2015-12-08	-30.0804	-51.2109
764	0	2015-12-08	-30.0812	-51.2053
765	1	2015-12-08	-30.079	-51.2046
766	1	2015-12-08	-30.0826	-51.2071
767	0	2015-12-08	-30.0859	-51.2049
770	1	2015-12-08	-30.0185	-51.1591
778	0	2015-12-08	-30.0289	-51.1565
839	0	2015-12-08	-30.0261	-51.1508
841	0	2015-12-08	-30.0219	-51.1515
843	0	2015-12-08	-30.0246	-51.1511
844	1	2015-12-08	-30.0201	-51.1518
846	0	2015-12-08	-30.0179	-51.1512
588	0	2015-12-08	-30.0323	-51.1576
602	1	2015-12-08	-30.0366	-51.1583
743	0	2015-12-08	-30.0386	-51.1562
744	0	2015-12-08	-30.0355	-51.1574
793	0	2015-12-08	-30.0339	-51.1538
794	0	2015-12-08	-30.0316	-51.1556
797	0	2015-12-08	-30.0362	-51.1544
799	1	2015-12-08	-30.0286	-51.1533
811	0	2015-12-08	-30.0308	-51.1485
812	1	2015-12-08	-30.0327	-51.1497
813	1	2015-12-08	-30.029	-51.1506
815	0	2015-12-08	-30.0283	-51.1476
816	1	2015-12-08	-30.0306	-51.1521
177	0	2015-12-09	-30.0515	-51.209
182	0	2015-12-09	-30.0506	-51.2118
199	0	2015-12-09	-30.0528	-51.2144
200	0	2015-12-09	-30.0528	-51.2171
254	0	2015-12-09	-30.0547	-51.2153
264	1	2015-12-09	-30.0538	-51.2165
736	0	2015-12-09	-30.0508	-51.2157
739	0	2015-12-09	-30.0517	-51.2142
143	0	2015-12-09	-30.0439	-51.1616
197	0	2015-12-09	-30.0439	-51.1564
31	0	2015-12-09	-30.0458	-51.1657
34	0	2015-12-09	-30.0419	-51.1662
47	0	2015-12-09	-30.0411	-51.1684
49	0	2015-12-09	-30.0459	-51.1721
86	0	2015-12-09	-30.0414	-51.1718
87	0	2015-12-09	-30.0435	-51.1686
88	0	2015-12-09	-30.0457	-51.1688
90	1	2015-12-09	-30.0413	-51.163
330	0	2015-12-09	-30.13	-51.2236
369	0	2015-12-09	-30.1209	-51.2208
370	0	2015-12-09	-30.1252	-51.2202
376	1	2015-12-09	-30.1317	-51.223
406	0	2015-12-09	-30.1354	-51.2236
430	0	2015-12-09	-30.124	-51.2238
569	0	2015-12-09	-30.1274	-51.2207
571	0	2015-12-09	-30.1302	-51.2203
575	0	2015-12-09	-30.1283	-51.2226
749	0	2015-12-09	-30.1336	-51.2248
779	0	2015-12-09	-30.1425	-51.2243
780	1	2015-12-09	-30.1416	-51.2228
782	0	2015-12-09	-30.141	-51.2244
784	0	2015-12-09	-30.1371	-51.2235
786	0	2015-12-09	-30.1393	-51.2266
787	0	2015-12-09	-30.1329	-51.2322
790	0	2015-12-09	-30.1361	-51.2302
791	0	2015-12-09	-30.1375	-51.2279
792	0	2015-12-09	-30.1302	-51.2334
434	1	2015-12-09	-30.0558	-51.1435
201	2	2015-12-09	-30.0497	-51.1648
207	0	2015-12-09	-30.0502	-51.1686
244	0	2015-12-09	-30.0483	-51.1714
246	0	2015-12-09	-30.0488	-51.1695
247	1	2015-12-09	-30.0483	-51.1663
248	0	2015-12-09	-30.0503	-51.1717
702	2	2015-12-09	-30.0659	-51.2088
703	0	2015-12-09	-30.063	-51.2132
710	0	2015-12-09	-30.062	-51.2081
711	1	2015-12-09	-30.064	-51.206
712	0	2015-12-09	-30.0668	-51.2054
714	1	2015-12-09	-30.0586	-51.2112
716	0	2015-12-09	-30.0579	-51.2134
717	0	2015-12-09	-30.0596	-51.2101
718	0	2015-12-09	-30.0547	-51.2118
719	0	2015-12-09	-30.0626	-51.212
720	0	2015-12-09	-30.0564	-51.2099
721	0	2015-12-09	-30.07	-51.2105
722	0	2015-12-09	-30.0686	-51.2093
723	2	2015-12-09	-30.0665	-51.2107
724	0	2015-12-09	-30.0622	-51.2159
725	0	2015-12-09	-30.0605	-51.2185
726	0	2015-12-09	-30.0678	-51.2123
730	0	2015-12-09	-30.0613	-51.2146
731	0	2015-12-09	-30.0641	-51.2151
732	0	2015-12-09	-30.0654	-51.2077
733	0	2015-12-09	-30.0647	-51.2116
734	0	2015-12-09	-30.0594	-51.2126
735	0	2015-12-09	-30.0603	-51.2169
740	0	2015-12-09	-30.0632	-51.2096
629	0	2015-12-09	-30.049	-51.2184
451	0	2015-12-09	-30.0815	-51.217
452	0	2015-12-09	-30.0811	-51.2157
453	2	2015-12-09	-30.0833	-51.2185
454	0	2015-12-09	-30.0865	-51.2193
462	0	2015-12-09	-30.0862	-51.2225
512	0	2015-12-09	-30.0839	-51.224
577	0	2015-12-09	-30.0865	-51.2176
579	0	2015-12-09	-30.0888	-51.22
583	0	2015-12-09	-30.0836	-51.2152
604	0	2015-12-09	-30.0894	-51.2226
605	0	2015-12-09	-30.0909	-51.2197
607	0	2015-12-09	-30.0937	-51.2249
613	1	2015-12-09	-30.0906	-51.2281
614	0	2015-12-09	-30.0916	-51.2244
615	1	2015-12-09	-30.089	-51.2249
146	0	2015-12-09	-30.0577	-51.1897
147	0	2015-12-09	-30.0596	-51.1908
213	0	2015-12-09	-30.059	-51.1767
267	0	2015-12-09	-30.0596	-51.1563
268	0	2015-12-09	-30.0601	-51.1595
269	0	2015-12-09	-30.0575	-51.1566
270	0	2015-12-09	-30.0568	-51.1688
276	0	2015-12-09	-30.057	-51.1591
278	0	2015-12-09	-30.0576	-51.1611
282	0	2015-12-09	-30.0621	-51.1609
321	0	2015-12-09	-30.0596	-51.1563
324	3	2015-12-09	-30.0609	-51.1562
389	0	2015-12-09	-30.0552	-51.1961
401	0	2015-12-09	-30.0599	-51.1694
402	0	2015-12-09	-30.0596	-51.1611
42	0	2015-12-09	-30.0526	-51.201
44	0	2015-12-09	-30.0525	-51.1983
45	0	2015-12-09	-30.0522	-51.1953
46	0	2015-12-09	-30.0547	-51.1981
48	0	2015-12-09	-30.0497	-51.1962
50	0	2015-12-09	-30.0504	-51.1979
52	0	2015-12-09	-30.0526	-51.2029
53	0	2015-12-09	-30.0513	-51.2003
84	1	2015-12-09	-30.0534	-51.1933
113	0	2015-12-09	-30.0674	-51.2263
176	0	2015-12-09	-30.0748	-51.2184
181	1	2015-12-09	-30.0756	-51.2295
189	1	2015-12-09	-30.0748	-51.2275
193	0	2015-12-09	-30.0779	-51.2293
287	0	2015-12-09	-30.0691	-51.2144
294	0	2015-12-09	-30.0707	-51.2142
390	1	2015-12-09	-30.075	-51.2204
391	0	2015-12-09	-30.0776	-51.2228
393	2	2015-12-09	-30.075	-51.2148
394	0	2015-12-09	-30.0768	-51.2167
411	0	2015-12-09	-30.0732	-51.2204
450	0	2015-12-09	-30.0766	-51.2271
455	0	2015-12-09	-30.0794	-51.2289
464	0	2015-12-09	-30.0793	-51.2311
501	0	2015-12-09	-30.0824	-51.2254
563	3	2015-12-09	-30.0733	-51.2162
564	2	2015-12-09	-30.0731	-51.2139
621	0	2015-12-09	-30.0771	-51.2311
623	0	2015-12-09	-30.081	-51.2317
167	0	2015-12-09	-30.0501	-51.2064
628	0	2015-12-09	-30.0489	-51.2092
741	0	2015-12-09	-30.0494	-51.2011
860	0	2015-12-09	-30.045	-51.2078
862	0	2015-12-09	-30.0477	-51.209
863	0	2015-12-09	-30.045	-51.2052
864	0	2015-12-09	-30.0471	-51.2066
865	0	2015-12-09	-30.0508	-51.2032
866	0	2015-12-09	-30.0483	-51.2053
867	0	2015-12-09	-30.0497	-51.2037
868	0	2015-12-09	-30.0455	-51.2018
869	0	2015-12-09	-30.0478	-51.1981
870	0	2015-12-09	-30.0464	-51.1992
871	0	2015-12-09	-30.0452	-51.2011
872	0	2015-12-09	-30.0471	-51.2009
873	0	2015-12-09	-30.0443	-51.203
326	0	2015-12-09	-30.0621	-51.2059
336	0	2015-12-09	-30.0592	-51.2079
768	0	2015-12-09	-30.0226	-51.1586
769	1	2015-12-09	-30.0211	-51.1595
772	0	2015-12-09	-30.0208	-51.1571
774	0	2015-12-09	-30.0227	-51.1539
775	0	2015-12-09	-30.02	-51.154
776	0	2015-12-09	-30.024	-51.1536
777	0	2015-12-09	-30.0265	-51.153
829	0	2015-12-09	-30.0259	-51.148
830	0	2015-12-09	-30.0246	-51.1462
831	0	2015-12-09	-30.0222	-51.1464
832	0	2015-12-09	-30.0165	-51.1449
834	0	2015-12-09	-30.0144	-51.149
835	0	2015-12-09	-30.0237	-51.1485
836	1	2015-12-09	-30.02	-51.1468
838	0	2015-12-09	-30.0219	-51.1488
840	0	2015-12-09	-30.012	-51.1447
842	0	2015-12-09	-30.0137	-51.1451
845	0	2015-12-09	-30.0135	-51.147
847	1	2015-12-09	-30.0119	-51.1465
848	0	2015-12-09	-30.0131	-51.1487
849	0	2015-12-09	-30.018	-51.149
850	0	2015-12-09	-30.0195	-51.1493
851	0	2015-12-09	-30.0155	-51.147
492	0	2015-12-09	-30.0411	-51.1536
795	0	2015-12-09	-30.0377	-51.1519
796	0	2015-12-09	-30.0397	-51.1539
818	0	2015-12-09	-30.0358	-51.1514
237	0	2015-12-10	-30.0747	-51.1753
345	0	2015-12-10	-30.073	-51.1778
349	0	2015-12-10	-30.0735	-51.1755
351	0	2015-12-10	-30.0766	-51.1736
354	0	2015-12-10	-30.0782	-51.1727
357	0	2015-12-10	-30.0727	-51.1815
361	0	2015-12-10	-30.0752	-51.1815
364	0	2015-12-10	-30.075	-51.1841
417	0	2015-12-10	-30.0766	-51.1712
558	0	2015-12-10	-30.0705	-51.1914
144	0	2015-12-10	-30.0443	-51.1587
161	0	2015-12-10	-30.1095	-51.2229
250	0	2015-12-10	-30.1123	-51.2274
499	1	2015-12-10	-30.113	-51.2304
32	0	2015-12-10	-30.0447	-51.222
664	1	2015-12-10	-30.0394	-51.2231
665	0	2015-12-10	-30.0399	-51.2204
666	0	2015-12-10	-30.0399	-51.2262
669	0	2015-12-10	-30.0361	-51.2237
670	0	2015-12-10	-30.0357	-51.2218
671	0	2015-12-10	-30.0369	-51.221
672	0	2015-12-10	-30.0429	-51.2254
673	0	2015-12-10	-30.0383	-51.2256
674	0	2015-12-10	-30.0419	-51.2231
675	0	2015-12-10	-30.0419	-51.2207
21	0	2015-12-10	-30.0357	-51.2186
4	0	2015-12-10	-30.0328	-51.2197
686	0	2015-12-10	-30.0773	-51.1975
695	0	2015-12-10	-30.0755	-51.2082
747	0	2015-12-10	-30.1303	-51.2281
781	0	2015-12-10	-30.1403	-51.2209
785	0	2015-12-10	-30.1366	-51.2249
789	1	2015-12-10	-30.1331	-51.2286
800	0	2015-12-10	-30.1388	-51.2242
803	0	2015-12-10	-30.1269	-51.224
804	0	2015-12-10	-30.1285	-51.2261
824	0	2015-12-10	-30.1213	-51.2254
825	0	2015-12-10	-30.1215	-51.2286
826	0	2015-12-10	-30.1254	-51.2292
828	0	2015-12-10	-30.1236	-51.2256
700	0	2015-12-10	-30.0657	-51.2136
715	0	2015-12-10	-30.0648	-51.2025
114	1	2015-12-10	-30.0798	-51.2137
449	0	2015-12-10	-30.0899	-51.2172
467	0	2015-12-10	-30.0856	-51.2263
469	0	2015-12-10	-30.08	-51.2179
474	0	2015-12-10	-30.0789	-51.2159
481	1	2015-12-10	-30.0894	-51.2144
482	0	2015-12-10	-30.0873	-51.2156
483	0	2015-12-10	-30.0888	-51.2128
484	0	2015-12-10	-30.0894	-51.2102
485	0	2015-12-10	-30.0861	-51.2111
486	0	2015-12-10	-30.085	-51.2129
487	0	2015-12-10	-30.0867	-51.2128
488	0	2015-12-10	-30.091	-51.2135
496	2	2015-12-10	-30.0773	-51.2146
580	0	2015-12-10	-30.0862	-51.2157
606	0	2015-12-10	-30.0916	-51.222
611	0	2015-12-10	-30.0933	-51.2313
612	0	2015-12-10	-30.0924	-51.228
638	2	2015-12-10	-30.082	-51.2127
153	0	2015-12-10	-30.0611	-51.1925
271	0	2015-12-10	-30.06	-51.166
274	0	2015-12-10	-30.0573	-51.166
314	0	2015-12-10	-30.0638	-51.152
315	0	2015-12-10	-30.0642	-51.1535
316	0	2015-12-10	-30.0639	-51.1562
317	0	2015-12-10	-30.0618	-51.1542
318	0	2015-12-10	-30.0595	-51.1532
322	0	2015-12-10	-30.0617	-51.1516
388	2	2015-12-10	-30.0567	-51.1963
1	0	2015-12-10	-30.0667	-51.2343
15	4	2015-12-10	-30.0696	-51.2378
19	0	2015-12-10	-30.0657	-51.2316
232	0	2015-12-10	-30.0659	-51.2187
311	0	2015-12-10	-30.0723	-51.2183
407	0	2015-12-10	-30.0707	-51.2229
554	0	2015-12-10	-30.062	-51.2185
555	0	2015-12-10	-30.0648	-51.2174
557	1	2015-12-10	-30.0669	-51.215
61	0	2015-12-10	-30.068	-51.2323
8	0	2015-12-10	-30.0684	-51.2364
80	0	2015-12-10	-30.0714	-51.2329
262	0	2015-12-10	-30.0537	-51.207
263	0	2015-12-10	-30.0527	-51.2108
266	0	2015-12-10	-30.0525	-51.2057
319	0	2015-12-10	-30.0565	-51.2014
323	0	2015-12-10	-30.0585	-51.2022
329	0	2015-12-10	-30.06	-51.2054
331	0	2015-12-10	-30.0577	-51.2048
332	0	2015-12-10	-30.0541	-51.2043
333	0	2015-12-10	-30.053	-51.2078
334	1	2015-12-10	-30.0539	-51.2026
337	0	2015-12-10	-30.0552	-51.2075
341	0	2015-12-10	-30.0617	-51.1979
347	2	2015-12-10	-30.0644	-51.2004
352	0	2015-12-10	-30.0617	-51.2007
355	0	2015-12-10	-30.0622	-51.2031
360	1	2015-12-10	-30.0597	-51.1975
362	0	2015-12-10	-30.059	-51.1999
363	0	2015-12-10	-30.0606	-51.2028
365	0	2015-12-10	-30.0568	-51.1974
701	0	2015-12-10	-30.0583	-51.2038
773	0	2015-12-10	-30.0184	-51.1539
798	0	2015-12-10	-30.04	-51.1513
814	0	2015-12-10	-30.0327	-51.1524
817	0	2015-12-10	-30.0375	-51.1495
129	0	2015-12-11	-30.0477	-51.2128
169	0	2015-12-11	-30.0481	-51.2175
260	0	2015-12-11	-30.057	-51.2155
261	0	2015-12-11	-30.0586	-51.2171
265	0	2015-12-11	-30.0575	-51.2174
178	0	2015-12-11	-30.1075	-51.2254
668	1	2015-12-11	-30.0379	-51.2235
676	0	2015-12-11	-30.0416	-51.2182
168	0	2015-12-11	-30.0529	-51.2198
171	1	2015-12-11	-30.0505	-51.2202
568	0	2015-12-11	-30.0489	-51.221
570	1	2015-12-11	-30.0493	-51.2239
574	0	2015-12-11	-30.0469	-51.2239
578	0	2015-12-11	-30.0463	-51.2274
627	0	2015-12-11	-30.0501	-51.2224
630	0	2015-12-11	-30.0539	-51.2264
631	0	2015-12-11	-30.0518	-51.2241
632	0	2015-12-11	-30.0503	-51.2272
639	0	2015-12-11	-30.0554	-51.2183
640	0	2015-12-11	-30.0557	-51.2216
641	0	2015-12-11	-30.0562	-51.2243
642	0	2015-12-11	-30.0541	-51.2247
643	1	2015-12-11	-30.0537	-51.2218
644	0	2015-12-11	-30.0541	-51.2189
646	0	2015-12-11	-30.058	-51.2264
647	0	2015-12-11	-30.0587	-51.2217
648	1	2015-12-11	-30.0583	-51.2205
649	0	2015-12-11	-30.0584	-51.224
650	0	2015-12-11	-30.0559	-51.2265
651	0	2015-12-11	-30.0585	-51.2285
652	0	2015-12-11	-30.0555	-51.2287
653	0	2015-12-11	-30.061	-51.2249
654	0	2015-12-11	-30.0605	-51.2222
655	0	2015-12-11	-30.0602	-51.2241
656	0	2015-12-11	-30.0606	-51.2278
657	0	2015-12-11	-30.0609	-51.2294
659	0	2015-12-11	-30.0632	-51.23
660	0	2015-12-11	-30.0622	-51.2269
661	0	2015-12-11	-30.0628	-51.2234
737	0	2015-12-11	-30.0648	-51.2243
738	0	2015-12-11	-30.0643	-51.227
520	0	2015-12-11	-30.091	-51.2295
859	0	2015-12-11	-30.0443	-51.2129
727	0	2015-12-11	-30.0752	-51.2112
771	0	2015-12-11	-30.0179	-51.1574
837	0	2015-12-11	-30.0179	-51.1463
301	0	2015-12-14	-30.0662	-51.1857
309	0	2015-12-14	-30.0667	-51.1835
313	0	2015-12-14	-30.0689	-51.1844
367	0	2015-12-14	-30.0707	-51.186
419	0	2015-12-14	-30.0735	-51.1876
420	0	2015-12-14	-30.0733	-51.1899
422	2	2015-12-14	-30.0757	-51.1908
423	0	2015-12-14	-30.0751	-51.1867
424	0	2015-12-14	-30.0748	-51.1914
426	0	2015-12-14	-30.0728	-51.1917
560	0	2015-12-14	-30.0688	-51.1885
561	1	2015-12-14	-30.0713	-51.1905
105	0	2015-12-14	-30.0465	-51.215
667	0	2015-12-14	-30.044	-51.2153
71	0	2015-12-14	-30.0432	-51.2195
742	1	2015-12-14	-30.0447	-51.2192
96	0	2015-12-14	-30.0425	-51.216
99	0	2015-12-14	-30.0459	-51.2166
135	0	2015-12-14	-30.05	-51.162
138	0	2015-12-14	-30.0459	-51.1587
141	0	2015-12-14	-30.0456	-51.1565
143	1	2015-12-14	-30.0439	-51.1616
197	0	2015-12-14	-30.0439	-51.1564
35	2	2015-12-14	-30.0437	-51.1659
528	0	2015-12-14	-30.0478	-51.161
553	0	2015-12-14	-30.0451	-51.1544
603	0	2015-12-14	-30.0457	-51.1619
89	0	2015-12-14	-30.0413	-51.1585
91	2	2015-12-14	-30.0479	-51.1637
92	1	2015-12-14	-30.046	-51.1635
93	0	2015-12-14	-30.0446	-51.1637
126	0	2015-12-14	-30.1011	-51.2314
159	0	2015-12-14	-30.1029	-51.2315
196	0	2015-12-14	-30.1076	-51.2274
228	0	2015-12-14	-30.1148	-51.2264
235	0	2015-12-14	-30.1161	-51.2278
243	0	2015-12-14	-30.1141	-51.2294
250	0	2015-12-14	-30.1123	-51.2274
255	0	2015-12-14	-30.111	-51.2323
259	2	2015-12-14	-30.1097	-51.228
289	0	2015-12-14	-30.1056	-51.2326
291	0	2015-12-14	-30.1054	-51.2295
320	0	2015-12-14	-30.1069	-51.2313
325	0	2015-12-14	-30.109	-51.2315
39	0	2015-12-14	-30.0985	-51.2319
58	0	2015-12-14	-30.0979	-51.2344
552	0	2015-12-14	-30.0317	-51.1637
585	0	2015-12-14	-30.0344	-51.164
586	1	2015-12-14	-30.03	-51.1589
587	3	2015-12-14	-30.0302	-51.1626
589	0	2015-12-14	-30.0324	-51.1612
590	0	2015-12-14	-30.029	-51.1641
591	0	2015-12-14	-30.0404	-51.1674
592	0	2015-12-14	-30.0386	-51.1622
593	1	2015-12-14	-30.0347	-51.1608
594	2	2015-12-14	-30.0365	-51.1615
595	4	2015-12-14	-30.036	-51.1638
597	1	2015-12-14	-30.0366	-51.1657
598	1	2015-12-14	-30.0324	-51.1658
599	0	2015-12-14	-30.0389	-51.168
600	0	2015-12-14	-30.0338	-51.1595
601	2	2015-12-14	-30.0383	-51.1585
677	0	2015-12-14	-30.0739	-51.2015
683	0	2015-12-14	-30.0753	-51.2027
689	0	2015-12-14	-30.0726	-51.1951
692	0	2015-12-14	-30.0729	-51.1926
694	2	2015-12-14	-30.0754	-51.2003
697	0	2015-12-14	-30.0752	-51.2045
698	0	2015-12-14	-30.0771	-51.2062
704	0	2015-12-14	-30.0735	-51.199
745	0	2015-12-14	-30.1314	-51.2303
746	0	2015-12-14	-30.1303	-51.2311
747	0	2015-12-14	-30.1303	-51.2281
748	0	2015-12-14	-30.1318	-51.2255
749	0	2015-12-14	-30.1336	-51.2248
750	0	2015-12-14	-30.1351	-51.2276
751	0	2015-12-14	-30.1326	-51.2269
752	0	2015-12-14	-30.134	-51.2304
753	2	2015-12-14	-30.133	-51.2346
788	0	2015-12-14	-30.1344	-51.2331
240	2	2015-12-14	-30.0456	-51.1493
242	1	2015-12-14	-30.0435	-51.1492
371	0	2015-12-14	-30.0489	-51.1456
374	2	2015-12-14	-30.0463	-51.1448
386	3	2015-12-14	-30.0505	-51.1447
392	0	2015-12-14	-30.0482	-51.1489
395	1	2015-12-14	-30.0481	-51.147
396	1	2015-12-14	-30.0446	-51.1473
397	1	2015-12-14	-30.046	-51.1471
398	0	2015-12-14	-30.0526	-51.1474
478	0	2015-12-14	-30.054	-51.1494
479	1	2015-12-14	-30.0538	-51.1516
480	0	2015-12-14	-30.0512	-51.1495
148	2	2015-12-14	-30.0623	-51.1882
149	1	2015-12-14	-30.0619	-51.1905
152	0	2015-12-14	-30.067	-51.1909
153	0	2015-12-14	-30.0611	-51.1925
154	0	2015-12-14	-30.0599	-51.1932
215	0	2015-12-14	-30.0646	-51.1857
217	0	2015-12-14	-30.0618	-51.1956
219	0	2015-12-14	-30.0624	-51.1857
339	2	2015-12-14	-30.0674	-51.1956
344	0	2015-12-14	-30.0683	-51.2028
348	0	2015-12-14	-30.0692	-51.1982
372	0	2015-12-14	-30.0657	-51.1946
375	1	2015-12-14	-30.065	-51.1962
383	1	2015-12-14	-30.0693	-51.2008
385	1	2015-12-14	-30.071	-51.1983
400	0	2015-12-14	-30.0663	-51.2002
663	1	2015-12-14	-30.0612	-51.1965
106	0	2015-12-14	-30.0096	-51.1761
112	1	2015-12-14	-30.0098	-51.169
14	0	2015-12-14	-30.0094	-51.1786
158	0	2015-12-14	-30.0188	-51.1721
162	0	2015-12-14	-30.0206	-51.1711
208	0	2015-12-14	-30.0206	-51.168
209	0	2015-12-14	-30.0187	-51.1665
210	1	2015-12-14	-30.0199	-51.1617
211	0	2015-12-14	-30.0183	-51.1639
212	3	2015-12-14	-30.0165	-51.1634
239	0	2015-12-14	-30.0146	-51.1637
245	0	2015-12-14	-30.0122	-51.1637
252	0	2015-12-14	-30.0207	-51.1665
253	0	2015-12-14	-30.0206	-51.1643
26	0	2015-12-14	-30.0125	-51.1757
296	0	2015-12-14	-30.0254	-51.1638
308	0	2015-12-14	-30.014	-51.162
1	0	2015-12-14	-30.0667	-51.2343
121	0	2015-12-14	-30.0711	-51.2254
15	0	2015-12-14	-30.0696	-51.2378
160	0	2015-12-14	-30.0711	-51.2275
172	0	2015-12-14	-30.0723	-51.2309
19	0	2015-12-14	-30.0657	-51.2316
25	0	2015-12-14	-30.0662	-51.2274
258	0	2015-12-14	-30.07	-51.2168
28	1	2015-12-14	-30.0672	-51.23
36	0	2015-12-14	-30.0692	-51.2291
41	0	2015-12-14	-30.0705	-51.2298
414	3	2015-12-14	-30.0745	-51.2224
566	0	2015-12-14	-30.0726	-51.2282
57	0	2015-12-14	-30.0648	-51.2294
622	0	2015-12-14	-30.0745	-51.2319
72	1	2015-12-14	-30.07	-51.2319
8	0	2015-12-14	-30.0684	-51.2364
80	1	2015-12-14	-30.0714	-51.2329
489	0	2015-12-14	-30.0344	-51.1765
490	0	2015-12-14	-30.0363	-51.1735
491	1	2015-12-14	-30.0317	-51.1761
537	0	2015-12-14	-30.0308	-51.1739
538	0	2015-12-14	-30.0298	-51.1688
539	0	2015-12-14	-30.03	-51.1662
540	0	2015-12-14	-30.0323	-51.1687
541	0	2015-12-14	-30.0289	-51.1782
542	3	2015-12-14	-30.03	-51.1732
543	1	2015-12-14	-30.0277	-51.1726
544	0	2015-12-14	-30.0283	-51.1711
545	2	2015-12-14	-30.0294	-51.1703
546	0	2015-12-14	-30.0387	-51.173
547	1	2015-12-14	-30.0375	-51.1734
548	0	2015-12-14	-30.0361	-51.1689
549	0	2015-12-14	-30.037	-51.171
550	2	2015-12-14	-30.0343	-51.1696
551	0	2015-12-14	-30.0358	-51.1756
584	0	2015-12-14	-30.0307	-51.1802
596	0	2015-12-14	-30.0394	-51.1705
298	1	2015-12-15	-30.0679	-51.1804
312	0	2015-12-15	-30.0667	-51.1814
338	0	2015-12-15	-30.0701	-51.1815
340	0	2015-12-15	-30.0721	-51.1803
343	0	2015-12-15	-30.0712	-51.1782
416	0	2015-12-15	-30.0715	-51.1831
418	1	2015-12-15	-30.0726	-51.1847
559	0	2015-12-15	-30.0673	-51.1891
202	0	2015-12-15	-30.0522	-51.2129
256	0	2015-12-15	-30.0564	-51.2136
136	1	2015-12-15	-30.048	-51.1574
195	0	2015-12-15	-30.0453	-51.1514
529	1	2015-12-15	-30.0475	-51.1512
530	2	2015-12-15	-30.0507	-51.1527
532	0	2015-12-15	-30.0507	-51.1587
534	0	2015-12-15	-30.0473	-51.154
535	0	2015-12-15	-30.0504	-51.1568
94	1	2015-12-15	-30.0482	-51.1557
107	0	2015-12-15	-30.0972	-51.2302
110	1	2015-12-15	-30.0986	-51.2269
117	1	2015-12-15	-30.1006	-51.2272
127	3	2015-12-15	-30.1025	-51.2297
13	0	2015-12-15	-30.0969	-51.225
130	0	2015-12-15	-30.1034	-51.2279
133	0	2015-12-15	-30.1022	-51.2264
165	0	2015-12-15	-30.1084	-51.221
173	1	2015-12-15	-30.1063	-51.223
178	0	2015-12-15	-30.1075	-51.2254
185	1	2015-12-15	-30.105	-51.2267
187	0	2015-12-15	-30.1042	-51.2235
23	0	2015-12-15	-30.0954	-51.2298
5	0	2015-12-15	-30.0955	-51.2275
680	0	2015-12-15	-30.0714	-51.206
682	0	2015-12-15	-30.073	-51.2046
695	1	2015-12-15	-30.0755	-51.2082
399	0	2015-12-15	-30.0578	-51.1465
427	2	2015-12-15	-30.0577	-51.1513
428	0	2015-12-15	-30.0564	-51.1513
429	1	2015-12-15	-30.0594	-51.1518
431	1	2015-12-15	-30.0586	-51.1498
432	0	2015-12-15	-30.0595	-51.1501
433	0	2015-12-15	-30.0569	-51.1555
434	0	2015-12-15	-30.0558	-51.1435
435	0	2015-12-15	-30.0579	-51.1431
444	1	2015-12-15	-30.0577	-51.1445
446	0	2015-12-15	-30.062	-51.1451
470	0	2015-12-15	-30.0617	-51.1486
471	0	2015-12-15	-30.0643	-51.1491
472	0	2015-12-15	-30.0639	-51.1475
473	1	2015-12-15	-30.0628	-51.1471
475	1	2015-12-15	-30.0553	-51.1465
477	0	2015-12-15	-30.0556	-51.1489
662	1	2015-12-15	-30.0555	-51.1591
709	0	2015-12-15	-30.0701	-51.2057
572	0	2015-12-15	-30.0475	-51.2223
576	0	2015-12-15	-30.0473	-51.2187
581	1	2015-12-15	-30.0468	-51.2213
582	0	2015-12-15	-30.0442	-51.2263
633	2	2015-12-15	-30.0446	-51.2242
467	1	2015-12-15	-30.0856	-51.2263
608	0	2015-12-15	-30.0946	-51.2222
609	0	2015-12-15	-30.1002	-51.2249
610	3	2015-12-15	-30.1037	-51.2212
146	0	2015-12-15	-30.0577	-51.1897
147	0	2015-12-15	-30.0596	-51.1908
150	0	2015-12-15	-30.0639	-51.1886
151	0	2015-12-15	-30.0643	-51.1908
213	0	2015-12-15	-30.059	-51.1767
214	0	2015-12-15	-30.0596	-51.1798
220	0	2015-12-15	-30.0595	-51.1854
221	0	2015-12-15	-30.0587	-51.185
222	0	2015-12-15	-30.064	-51.1798
223	0	2015-12-15	-30.0607	-51.177
387	2	2015-12-15	-30.0641	-51.1924
388	0	2015-12-15	-30.0567	-51.1963
389	0	2015-12-15	-30.0552	-51.1961
42	0	2015-12-15	-30.0526	-51.201
44	0	2015-12-15	-30.0525	-51.1983
45	0	2015-12-15	-30.0522	-51.1953
46	0	2015-12-15	-30.0547	-51.1981
48	0	2015-12-15	-30.0497	-51.1962
50	0	2015-12-15	-30.0504	-51.1979
52	0	2015-12-15	-30.0526	-51.2029
53	0	2015-12-15	-30.0513	-51.2003
73	0	2015-12-15	-30.0576	-51.1907
74	0	2015-12-15	-30.0574	-51.193
83	0	2015-12-15	-30.055	-51.1907
84	0	2015-12-15	-30.0534	-51.1933
85	1	2015-12-15	-30.0549	-51.1925
100	0	2015-12-15	-30.0098	-51.1717
103	2	2015-12-15	-30.0094	-51.1737
123	1	2015-12-15	-30.0122	-51.1664
128	0	2015-12-15	-30.0114	-51.1681
17	0	2015-12-15	-30.0113	-51.1784
2	0	2015-12-15	-30.0112	-51.18
230	2	2015-12-15	-30.0138	-51.1689
234	0	2015-12-15	-30.0142	-51.1666
249	1	2015-12-15	-30.0164	-51.1668
290	0	2015-12-15	-30.0162	-51.1697
37	0	2015-12-15	-30.0141	-51.1769
55	0	2015-12-15	-30.0157	-51.1753
59	0	2015-12-15	-30.0176	-51.1716
63	8	2015-12-15	-30.0171	-51.1739
66	3	2015-12-15	-30.0146	-51.1733
7	0	2015-12-15	-30.0092	-51.1807
70	0	2015-12-15	-30.0121	-51.1722
75	2	2015-12-15	-30.0125	-51.1739
311	4	2015-12-15	-30.0723	-51.2183
382	2	2015-12-15	-30.0784	-51.2186
390	1	2015-12-15	-30.075	-51.2204
394	2	2015-12-15	-30.0768	-51.2167
466	2	2015-12-15	-30.0806	-51.227
476	1	2015-12-15	-30.0803	-51.2244
497	1	2015-12-15	-30.0811	-51.2226
554	3	2015-12-15	-30.062	-51.2185
555	1	2015-12-15	-30.0648	-51.2174
557	1	2015-12-15	-30.0669	-51.215
563	1	2015-12-15	-30.0733	-51.2162
564	7	2015-12-15	-30.0731	-51.2139
167	0	2015-12-15	-30.0501	-51.2064
628	0	2015-12-15	-30.0489	-51.2092
741	0	2015-12-15	-30.0494	-51.2011
857	0	2015-12-15	-30.0429	-51.2083
858	1	2015-12-15	-30.0437	-51.2109
860	0	2015-12-15	-30.045	-51.2078
861	0	2015-12-15	-30.0458	-51.2107
862	0	2015-12-15	-30.0477	-51.209
863	0	2015-12-15	-30.045	-51.2052
865	0	2015-12-15	-30.0508	-51.2032
866	0	2015-12-15	-30.0483	-51.2053
867	0	2015-12-15	-30.0497	-51.2037
869	0	2015-12-15	-30.0478	-51.1981
870	0	2015-12-15	-30.0464	-51.1992
871	0	2015-12-15	-30.0452	-51.2011
873	0	2015-12-15	-30.0443	-51.203
679	0	2015-12-15	-30.0826	-51.2046
705	0	2015-12-15	-30.0801	-51.2077
754	0	2015-12-15	-30.0845	-51.2084
755	0	2015-12-15	-30.0842	-51.2064
756	0	2015-12-15	-30.0777	-51.2121
757	0	2015-12-15	-30.0843	-51.2112
759	0	2015-12-15	-30.0872	-51.2068
760	0	2015-12-15	-30.0861	-51.2091
761	0	2015-12-15	-30.082	-51.2092
762	0	2015-12-15	-30.0785	-51.2089
763	0	2015-12-15	-30.0804	-51.2109
764	0	2015-12-15	-30.0812	-51.2053
765	1	2015-12-15	-30.079	-51.2046
766	0	2015-12-15	-30.0826	-51.2071
767	0	2015-12-15	-30.0859	-51.2049
492	0	2015-12-15	-30.0411	-51.1536
588	0	2015-12-15	-30.0323	-51.1576
602	1	2015-12-15	-30.0366	-51.1583
743	0	2015-12-15	-30.0386	-51.1562
744	0	2015-12-15	-30.0355	-51.1574
793	0	2015-12-15	-30.0339	-51.1538
794	1	2015-12-15	-30.0316	-51.1556
795	5	2015-12-15	-30.0377	-51.1519
796	0	2015-12-15	-30.0397	-51.1539
797	0	2015-12-15	-30.0362	-51.1544
798	0	2015-12-15	-30.04	-51.1513
799	1	2015-12-15	-30.0286	-51.1533
811	0	2015-12-15	-30.0308	-51.1485
812	0	2015-12-15	-30.0327	-51.1497
813	0	2015-12-15	-30.029	-51.1506
814	0	2015-12-15	-30.0327	-51.1524
815	0	2015-12-15	-30.0283	-51.1476
816	0	2015-12-15	-30.0306	-51.1521
817	0	2015-12-15	-30.0375	-51.1495
818	0	2015-12-15	-30.0358	-51.1514
443	0	2015-12-16	-30.0713	-51.1933
558	0	2015-12-16	-30.0705	-51.1914
134	0	2015-12-16	-30.0416	-51.1605
144	0	2015-12-16	-30.0443	-51.1587
191	1	2015-12-16	-30.044	-51.1516
194	1	2015-12-16	-30.0419	-51.1523
198	2	2015-12-16	-30.0422	-51.1553
31	1	2015-12-16	-30.0463	-51.1662
34	0	2015-12-16	-30.0419	-51.1662
47	0	2015-12-16	-30.0411	-51.1684
49	0	2015-12-16	-30.0459	-51.1721
86	0	2015-12-16	-30.0414	-51.1718
87	1	2015-12-16	-30.0435	-51.1686
88	0	2015-12-16	-30.0457	-51.1688
90	1	2015-12-16	-30.0413	-51.163
681	0	2015-12-16	-30.0777	-51.2044
687	0	2015-12-16	-30.0717	-51.2025
690	0	2015-12-16	-30.0726	-51.1998
691	0	2015-12-16	-30.071	-51.1999
706	0	2015-12-16	-30.0707	-51.1971
779	0	2015-12-16	-30.1425	-51.2243
780	0	2015-12-16	-30.1416	-51.2228
781	0	2015-12-16	-30.1403	-51.2209
782	0	2015-12-16	-30.141	-51.2244
783	0	2015-12-16	-30.1389	-51.2219
784	0	2015-12-16	-30.1371	-51.2235
785	0	2015-12-16	-30.1366	-51.2249
786	0	2015-12-16	-30.1393	-51.2266
787	1	2015-12-16	-30.1329	-51.2322
790	0	2015-12-16	-30.1361	-51.2302
791	0	2015-12-16	-30.1375	-51.2279
792	0	2015-12-16	-30.1302	-51.2334
302	0	2015-12-16	-30.0445	-51.1421
303	5	2015-12-16	-30.0434	-51.1448
304	1	2015-12-16	-30.0466	-51.1411
307	1	2015-12-16	-30.0449	-51.137
201	0	2015-12-16	-30.0497	-51.1648
207	1	2015-12-16	-30.0502	-51.1686
244	0	2015-12-16	-30.0483	-51.1714
246	0	2015-12-16	-30.0488	-51.1695
247	3	2015-12-16	-30.0483	-51.1663
248	1	2015-12-16	-30.0503	-51.1717
685	0	2015-12-16	-30.0682	-51.2079
703	1	2015-12-16	-30.063	-51.2132
713	0	2015-12-16	-30.0688	-51.2045
722	1	2015-12-16	-30.0686	-51.2093
723	3	2015-12-16	-30.0665	-51.2107
724	0	2015-12-16	-30.0622	-51.2159
725	0	2015-12-16	-30.0605	-51.2185
726	0	2015-12-16	-30.0678	-51.2123
728	0	2015-12-16	-30.0709	-51.2125
729	3	2015-12-16	-30.0722	-51.2122
730	0	2015-12-16	-30.0613	-51.2146
731	0	2015-12-16	-30.0641	-51.2151
735	0	2015-12-16	-30.0603	-51.2169
114	0	2015-12-16	-30.0798	-51.2137
452	0	2015-12-16	-30.0811	-51.2157
453	0	2015-12-16	-30.0833	-51.2185
454	0	2015-12-16	-30.0865	-51.2193
462	2	2015-12-16	-30.0862	-51.2225
465	0	2015-12-16	-30.0829	-51.2222
469	0	2015-12-16	-30.08	-51.2179
474	1	2015-12-16	-30.0789	-51.2159
496	0	2015-12-16	-30.0773	-51.2146
512	0	2015-12-16	-30.0839	-51.224
577	0	2015-12-16	-30.0865	-51.2176
579	0	2015-12-16	-30.0888	-51.22
583	0	2015-12-16	-30.0836	-51.2152
604	0	2015-12-16	-30.0894	-51.2226
605	0	2015-12-16	-30.0909	-51.2197
606	0	2015-12-16	-30.0916	-51.222
613	0	2015-12-16	-30.0906	-51.2281
615	0	2015-12-16	-30.089	-51.2249
638	1	2015-12-16	-30.082	-51.2127
156	0	2015-12-16	-30.0685	-51.1937
216	0	2015-12-16	-30.064	-51.1985
218	0	2015-12-16	-30.0589	-51.1958
267	0	2015-12-16	-30.0596	-51.1563
268	0	2015-12-16	-30.0601	-51.1595
269	0	2015-12-16	-30.0575	-51.1566
270	0	2015-12-16	-30.0568	-51.1688
271	0	2015-12-16	-30.06	-51.166
274	0	2015-12-16	-30.0573	-51.166
276	0	2015-12-16	-30.057	-51.1591
278	1	2015-12-16	-30.0576	-51.1611
282	0	2015-12-16	-30.0621	-51.1609
314	0	2015-12-16	-30.0638	-51.152
315	0	2015-12-16	-30.0642	-51.1535
316	0	2015-12-16	-30.0639	-51.1562
317	0	2015-12-16	-30.0618	-51.1542
318	0	2015-12-16	-30.0595	-51.1532
321	0	2015-12-16	-30.0596	-51.1563
322	0	2015-12-16	-30.0617	-51.1516
324	0	2015-12-16	-30.0609	-51.1562
380	0	2015-12-16	-30.0666	-51.1987
401	1	2015-12-16	-30.0599	-51.1694
402	0	2015-12-16	-30.0596	-51.1611
113	0	2015-12-16	-30.0674	-51.2263
131	0	2015-12-16	-30.0739	-51.2251
181	1	2015-12-16	-30.0756	-51.2295
193	0	2015-12-16	-30.0779	-51.2293
224	0	2015-12-16	-30.0666	-51.2219
232	0	2015-12-16	-30.0659	-51.2187
283	0	2015-12-16	-30.0689	-51.2229
287	0	2015-12-16	-30.0691	-51.2144
294	0	2015-12-16	-30.0707	-51.2142
378	0	2015-12-16	-30.0801	-51.2201
391	0	2015-12-16	-30.0776	-51.2228
393	0	2015-12-16	-30.075	-51.2148
403	0	2015-12-16	-30.0716	-51.2212
405	0	2015-12-16	-30.0726	-51.2233
407	2	2015-12-16	-30.0707	-51.2229
411	0	2015-12-16	-30.0732	-51.2204
421	0	2015-12-16	-30.0754	-51.2242
450	1	2015-12-16	-30.0766	-51.2271
455	0	2015-12-16	-30.0794	-51.2289
464	0	2015-12-16	-30.0793	-51.2311
468	0	2015-12-16	-30.079	-51.2259
506	0	2015-12-16	-30.0791	-51.2225
522	0	2015-12-16	-30.0848	-51.2303
531	0	2015-12-16	-30.0819	-51.2295
621	0	2015-12-16	-30.0771	-51.2311
623	0	2015-12-16	-30.081	-51.2317
95	0	2015-12-16	-30.067	-51.2242
98	0	2015-12-16	-30.0693	-51.2254
770	0	2015-12-16	-30.0185	-51.1591
778	0	2015-12-16	-30.0289	-51.1565
829	1	2015-12-16	-30.0259	-51.148
831	0	2015-12-16	-30.0222	-51.1464
832	0	2015-12-16	-30.0165	-51.1449
834	0	2015-12-16	-30.0144	-51.149
835	1	2015-12-16	-30.0237	-51.1485
836	0	2015-12-16	-30.02	-51.1468
837	0	2015-12-16	-30.0179	-51.1463
838	0	2015-12-16	-30.0219	-51.1488
839	0	2015-12-16	-30.0261	-51.1508
840	0	2015-12-16	-30.012	-51.1447
841	0	2015-12-16	-30.0219	-51.1515
842	0	2015-12-16	-30.0137	-51.1451
843	0	2015-12-16	-30.0246	-51.1511
844	1	2015-12-16	-30.0201	-51.1518
845	0	2015-12-16	-30.0135	-51.147
846	0	2015-12-16	-30.0179	-51.1512
847	1	2015-12-16	-30.0119	-51.1465
848	1	2015-12-16	-30.0131	-51.1487
849	0	2015-12-16	-30.018	-51.149
851	0	2015-12-16	-30.0155	-51.147
237	0	2015-12-17	-30.0747	-51.1753
345	0	2015-12-17	-30.073	-51.1778
349	0	2015-12-17	-30.0735	-51.1755
351	0	2015-12-17	-30.0766	-51.1736
354	2	2015-12-17	-30.0782	-51.1727
357	0	2015-12-17	-30.0727	-51.1815
364	2	2015-12-17	-30.075	-51.1841
417	0	2015-12-17	-30.0766	-51.1712
118	0	2015-12-17	-30.0459	-51.2128
129	0	2015-12-17	-30.0477	-51.2128
169	3	2015-12-17	-30.0481	-51.2175
177	0	2015-12-17	-30.0515	-51.209
182	2	2015-12-17	-30.0506	-51.2118
188	0	2015-12-17	-30.0497	-51.2138
122	0	2015-12-17	-30.1004	-51.2296
161	0	2015-12-17	-30.1095	-51.2229
330	0	2015-12-17	-30.13	-51.2236
369	0	2015-12-17	-30.1209	-51.2208
370	0	2015-12-17	-30.1252	-51.2202
376	0	2015-12-17	-30.1317	-51.223
379	0	2015-12-17	-30.1335	-51.2185
404	0	2015-12-17	-30.1375	-51.2205
406	1	2015-12-17	-30.1354	-51.2236
430	0	2015-12-17	-30.124	-51.2238
499	0	2015-12-17	-30.113	-51.2304
569	0	2015-12-17	-30.1274	-51.2207
571	0	2015-12-17	-30.1302	-51.2203
575	0	2015-12-17	-30.1283	-51.2226
32	0	2015-12-17	-30.0447	-51.222
664	0	2015-12-17	-30.0394	-51.2231
665	1	2015-12-17	-30.0399	-51.2204
666	0	2015-12-17	-30.0399	-51.2262
668	0	2015-12-17	-30.0379	-51.2235
669	1	2015-12-17	-30.0361	-51.2237
670	0	2015-12-17	-30.0357	-51.2218
671	0	2015-12-17	-30.0369	-51.221
672	0	2015-12-17	-30.0429	-51.2254
673	0	2015-12-17	-30.0383	-51.2256
674	1	2015-12-17	-30.0419	-51.2231
675	0	2015-12-17	-30.0419	-51.2207
676	0	2015-12-17	-30.0416	-51.2182
789	0	2015-12-17	-30.1331	-51.2286
800	1	2015-12-17	-30.1388	-51.2242
804	0	2015-12-17	-30.1285	-51.2261
824	0	2015-12-17	-30.1213	-51.2254
825	0	2015-12-17	-30.1215	-51.2286
826	0	2015-12-17	-30.1254	-51.2292
827	0	2015-12-17	-30.1228	-51.2275
828	0	2015-12-17	-30.1236	-51.2256
702	2	2015-12-17	-30.0659	-51.2088
710	0	2015-12-17	-30.062	-51.2081
712	0	2015-12-17	-30.0668	-51.2054
716	0	2015-12-17	-30.0579	-51.2134
717	1	2015-12-17	-30.0596	-51.2101
718	0	2015-12-17	-30.0547	-51.2118
719	0	2015-12-17	-30.0626	-51.212
720	0	2015-12-17	-30.0564	-51.2099
721	0	2015-12-17	-30.07	-51.2105
732	0	2015-12-17	-30.0654	-51.2077
733	0	2015-12-17	-30.0647	-51.2116
740	3	2015-12-17	-30.0632	-51.2096
168	0	2015-12-17	-30.0529	-51.2198
171	0	2015-12-17	-30.0505	-51.2202
568	0	2015-12-17	-30.0489	-51.221
570	0	2015-12-17	-30.0493	-51.2239
574	0	2015-12-17	-30.0469	-51.2239
578	0	2015-12-17	-30.0463	-51.2274
627	0	2015-12-17	-30.0501	-51.2224
630	0	2015-12-17	-30.0539	-51.2264
631	0	2015-12-17	-30.0518	-51.2241
632	0	2015-12-17	-30.0503	-51.2272
640	0	2015-12-17	-30.0557	-51.2216
641	0	2015-12-17	-30.0562	-51.2243
642	0	2015-12-17	-30.0541	-51.2247
643	0	2015-12-17	-30.0537	-51.2218
646	0	2015-12-17	-30.058	-51.2264
647	0	2015-12-17	-30.0587	-51.2217
648	0	2015-12-17	-30.0583	-51.2205
649	0	2015-12-17	-30.0584	-51.224
650	0	2015-12-17	-30.0559	-51.2265
651	0	2015-12-17	-30.0585	-51.2285
652	0	2015-12-17	-30.0555	-51.2287
653	0	2015-12-17	-30.061	-51.2249
654	0	2015-12-17	-30.0605	-51.2222
655	0	2015-12-17	-30.0602	-51.2241
660	0	2015-12-17	-30.0622	-51.2269
661	0	2015-12-17	-30.0628	-51.2234
737	0	2015-12-17	-30.0648	-51.2243
449	0	2015-12-17	-30.0899	-51.2172
451	0	2015-12-17	-30.0815	-51.217
481	0	2015-12-17	-30.0894	-51.2144
482	0	2015-12-17	-30.0873	-51.2156
483	0	2015-12-17	-30.0888	-51.2128
485	0	2015-12-17	-30.0861	-51.2111
486	0	2015-12-17	-30.085	-51.2129
488	0	2015-12-17	-30.091	-51.2135
614	0	2015-12-17	-30.0916	-51.2244
157	0	2015-12-17	-30.0689	-51.1907
176	0	2015-12-17	-30.0748	-51.2184
189	0	2015-12-17	-30.0748	-51.2275
384	0	2015-12-17	-30.078	-51.2207
501	0	2015-12-17	-30.0824	-51.2254
519	0	2015-12-17	-30.0838	-51.2276
54	0	2015-12-17	-30.0405	-51.2139
852	0	2015-12-17	-30.0382	-51.2096
853	0	2015-12-17	-30.0398	-51.2114
854	0	2015-12-17	-30.0432	-51.2138
855	0	2015-12-17	-30.0419	-51.211
856	0	2015-12-17	-30.0408	-51.2093
868	1	2015-12-17	-30.046	-51.2035
872	0	2015-12-17	-30.0471	-51.2009
326	2	2015-12-17	-30.0621	-51.2059
336	0	2015-12-17	-30.0592	-51.2079
361	0	2015-12-18	-30.0752	-51.1815
199	0	2015-12-18	-30.0528	-51.2144
200	0	2015-12-18	-30.0528	-51.2171
254	0	2015-12-18	-30.0547	-51.2153
260	0	2015-12-18	-30.057	-51.2155
261	0	2015-12-18	-30.0586	-51.2171
264	0	2015-12-18	-30.0538	-51.2165
265	0	2015-12-18	-30.0575	-51.2174
736	0	2015-12-18	-30.0508	-51.2157
739	0	2015-12-18	-30.0517	-51.2142
192	5	2015-12-18	-30.0431	-51.1535
12	0	2015-12-18	-30.0332	-51.2173
21	0	2015-12-18	-30.0357	-51.2186
4	0	2015-12-18	-30.0328	-51.2197
56	0	2015-12-18	-30.0364	-51.2107
60	0	2015-12-18	-30.039	-51.2138
67	0	2015-12-18	-30.0402	-51.2158
425	0	2015-12-18	-30.0783	-51.1996
696	0	2015-12-18	-30.08	-51.1974
678	0	2015-12-18	-30.0776	-51.2026
684	0	2015-12-18	-30.0798	-51.2006
686	0	2015-12-18	-30.0773	-51.1975
688	0	2015-12-18	-30.0756	-51.1941
693	0	2015-12-18	-30.0753	-51.198
699	0	2015-12-18	-30.0791	-51.1971
803	0	2015-12-18	-30.1269	-51.224
700	0	2015-12-18	-30.0657	-51.2136
708	0	2015-12-18	-30.0716	-51.2088
711	0	2015-12-18	-30.064	-51.206
714	0	2015-12-18	-30.0586	-51.2112
715	0	2015-12-18	-30.0648	-51.2025
734	0	2015-12-18	-30.0594	-51.2126
629	0	2015-12-18	-30.049	-51.2184
639	0	2015-12-18	-30.0554	-51.2183
644	0	2015-12-18	-30.0541	-51.2189
656	0	2015-12-18	-30.0606	-51.2278
657	0	2015-12-18	-30.0609	-51.2294
659	0	2015-12-18	-30.0632	-51.23
738	0	2015-12-18	-30.0643	-51.227
484	0	2015-12-18	-30.0894	-51.2102
487	0	2015-12-18	-30.0867	-51.2128
520	0	2015-12-18	-30.091	-51.2295
580	0	2015-12-18	-30.0862	-51.2157
607	0	2015-12-18	-30.0937	-51.2249
611	0	2015-12-18	-30.0933	-51.2313
612	1	2015-12-18	-30.0924	-51.228
61	0	2015-12-18	-30.068	-51.2323
859	0	2015-12-18	-30.0443	-51.2129
864	0	2015-12-18	-30.0471	-51.2066
262	0	2015-12-18	-30.0537	-51.207
263	0	2015-12-18	-30.0527	-51.2108
266	1	2015-12-18	-30.0525	-51.2057
319	0	2015-12-18	-30.0565	-51.2014
323	0	2015-12-18	-30.0585	-51.2022
329	1	2015-12-18	-30.06	-51.2054
331	0	2015-12-18	-30.0577	-51.2048
332	1	2015-12-18	-30.0541	-51.2043
333	0	2015-12-18	-30.053	-51.2078
334	0	2015-12-18	-30.0539	-51.2026
337	0	2015-12-18	-30.0552	-51.2075
341	0	2015-12-18	-30.0617	-51.1979
347	1	2015-12-18	-30.0644	-51.2004
352	0	2015-12-18	-30.0617	-51.2007
355	1	2015-12-18	-30.0622	-51.2031
360	0	2015-12-18	-30.0597	-51.1975
362	0	2015-12-18	-30.059	-51.1999
363	0	2015-12-18	-30.0606	-51.2028
365	0	2015-12-18	-30.0568	-51.1974
701	0	2015-12-18	-30.0583	-51.2038
727	0	2015-12-18	-30.0752	-51.2112
768	0	2015-12-18	-30.0226	-51.1586
769	1	2015-12-18	-30.0211	-51.1595
771	0	2015-12-18	-30.0179	-51.1574
772	0	2015-12-18	-30.0208	-51.1571
773	0	2015-12-18	-30.0184	-51.1539
774	0	2015-12-18	-30.0227	-51.1539
775	0	2015-12-18	-30.02	-51.154
776	1	2015-12-18	-30.024	-51.1536
777	0	2015-12-18	-30.0265	-51.153
830	0	2015-12-18	-30.0246	-51.1462
850	0	2015-12-18	-30.0195	-51.1493
301	0	2015-12-21	-30.0662	-51.1857
309	0	2015-12-21	-30.0667	-51.1835
313	0	2015-12-21	-30.0689	-51.1844
367	0	2015-12-21	-30.0707	-51.186
419	0	2015-12-21	-30.0735	-51.1876
420	1	2015-12-21	-30.0733	-51.1899
423	0	2015-12-21	-30.0751	-51.1867
424	0	2015-12-21	-30.0748	-51.1914
426	0	2015-12-21	-30.0728	-51.1917
559	0	2015-12-21	-30.0673	-51.1891
560	0	2015-12-21	-30.0688	-51.1885
561	0	2015-12-21	-30.0713	-51.1905
134	1	2015-12-21	-30.0416	-51.1605
135	0	2015-12-21	-30.05	-51.162
138	1	2015-12-21	-30.0459	-51.1587
141	0	2015-12-21	-30.0456	-51.1565
191	1	2015-12-21	-30.044	-51.1516
192	1	2015-12-21	-30.0431	-51.1535
197	0	2015-12-21	-30.0439	-51.1564
198	0	2015-12-21	-30.0422	-51.1553
35	0	2015-12-21	-30.0437	-51.1659
528	0	2015-12-21	-30.0478	-51.161
553	0	2015-12-21	-30.0451	-51.1544
603	4	2015-12-21	-30.0457	-51.1619
89	0	2015-12-21	-30.0413	-51.1585
91	1	2015-12-21	-30.0479	-51.1637
92	0	2015-12-21	-30.046	-51.1635
93	0	2015-12-21	-30.0446	-51.1637
552	0	2015-12-21	-30.0317	-51.1637
585	4	2015-12-21	-30.0344	-51.164
586	0	2015-12-21	-30.03	-51.1589
587	1	2015-12-21	-30.0302	-51.1626
589	0	2015-12-21	-30.0324	-51.1612
590	0	2015-12-21	-30.029	-51.1641
591	0	2015-12-21	-30.0404	-51.1674
592	1	2015-12-21	-30.0386	-51.1622
593	1	2015-12-21	-30.0347	-51.1608
594	6	2015-12-21	-30.0365	-51.1615
595	4	2015-12-21	-30.036	-51.1638
597	0	2015-12-21	-30.0366	-51.1657
598	0	2015-12-21	-30.0324	-51.1658
599	0	2015-12-21	-30.0389	-51.168
600	1	2015-12-21	-30.0338	-51.1595
664	0	2015-12-21	-30.0394	-51.2231
668	0	2015-12-21	-30.0379	-51.2235
676	0	2015-12-21	-30.0416	-51.2182
425	0	2015-12-21	-30.0783	-51.1996
696	0	2015-12-21	-30.08	-51.1974
677	0	2015-12-21	-30.0739	-51.2015
678	0	2015-12-21	-30.0776	-51.2026
681	0	2015-12-21	-30.0777	-51.2044
683	0	2015-12-21	-30.0753	-51.2027
684	0	2015-12-21	-30.0798	-51.2006
686	0	2015-12-21	-30.0773	-51.1975
688	0	2015-12-21	-30.0756	-51.1941
689	0	2015-12-21	-30.0726	-51.1951
692	0	2015-12-21	-30.0729	-51.1926
693	0	2015-12-21	-30.0753	-51.198
694	0	2015-12-21	-30.0754	-51.2003
695	0	2015-12-21	-30.0755	-51.2082
697	0	2015-12-21	-30.0752	-51.2045
699	2	2015-12-21	-30.0791	-51.1971
704	0	2015-12-21	-30.0735	-51.199
747	0	2015-12-21	-30.1303	-51.2281
748	0	2015-12-21	-30.1318	-51.2255
749	0	2015-12-21	-30.1336	-51.2248
750	0	2015-12-21	-30.1351	-51.2276
751	0	2015-12-21	-30.1326	-51.2269
752	0	2015-12-21	-30.134	-51.2304
753	0	2015-12-21	-30.133	-51.2346
788	0	2015-12-21	-30.1344	-51.2331
790	0	2015-12-21	-30.1361	-51.2302
881	0	2015-12-21	-30.0518	-51.1765
886	0	2015-12-21	-30.0487	-51.1742
888	0	2015-12-21	-30.0529	-51.179
889	0	2015-12-21	-30.0548	-51.1793
890	1	2015-12-21	-30.0482	-51.1774
891	3	2015-12-21	-30.0547	-51.1821
892	0	2015-12-21	-30.0563	-51.1806
893	2	2015-12-21	-30.0524	-51.181
894	0	2015-12-21	-30.0558	-51.1755
895	0	2015-12-21	-30.0553	-51.1696
896	0	2015-12-21	-30.0544	-51.1725
897	0	2015-12-21	-30.0571	-51.1777
240	0	2015-12-21	-30.0456	-51.1493
242	1	2015-12-21	-30.0435	-51.1492
302	0	2015-12-21	-30.0445	-51.1421
303	3	2015-12-21	-30.0434	-51.1448
304	0	2015-12-21	-30.0466	-51.1411
307	0	2015-12-21	-30.0449	-51.137
371	1	2015-12-21	-30.0489	-51.1456
374	0	2015-12-21	-30.0463	-51.1448
386	1	2015-12-21	-30.0505	-51.1447
392	0	2015-12-21	-30.0482	-51.1489
395	1	2015-12-21	-30.0481	-51.147
396	1	2015-12-21	-30.0446	-51.1473
397	0	2015-12-21	-30.046	-51.1471
398	1	2015-12-21	-30.0526	-51.1474
[truncated: 20,726 more rows]
